# Supplementary material for: An International Reference Consensus Genetic Map with 897 Marker Loci Based on 11 Mapping Populations for Tetraploid Groundnut (Arachis hypogaea L.)
Source: PLoS One. 2012 Jul 18;7(7):e41213. doi: 10.1371/journal.pone.0041213 (PMC3399818; doi:10.1371/journal.pone.0041213)
Supplement: Table S1 — Details of the component and the reference consensus genetic maps with marker distances. This table provides the comparative details on mapped loci and their map distance in each LGs of component genetic maps (RIL-1, RIL-2, RIL-3, RIL-4, RIL-5, RIL-6, RIL-7, RIL-8, RIL-9, RIL-10 and BC-1) and the reference consensus map. (XLS) [file pone.0041213.s003.xls]

## Sheet: Table S3
Table S3: Details of the reference consensus genetic map including marker loci, position, SSR motif, PIC values and primer sequence information
LGs	Bin Name	Name of marker	Position (cM)	SSR motif	PIC values	Forward Primer Sequence (5'-3')	Reverse Primer Sequence (5'-3')	References
a01	a01_01	seq14A7	0	(CTT/CTG)7		GTACGCTTTTAATTTGCGGG	CTGGAAAGCCTTGAGAGCAT	Ferguson et al. 2004
a01	a01_01	seq3B5	2.6	(GA)42	0.375	CCTCCCTGCTTGATCCAATA	AACTGTAGCGAATGTGTTACATGG	Ferguson et al. 2004
a01	a01_02	seq2H12	20.5	(TAA)37		CGGTCATGTCCATTAAGTGCT	CGAGCTTCGAAACTACCTCG	Ferguson et al. 2004
a01	a01_02	GM2350	21.37	(GA)20	0.370605	GACTGTGTGGTTGGTGGTTTT	CTCCTTGACCTCCTGGAGAAT	Knapp et al. (unpublished)
a01	a01_02	GM2724a	24.67	TTC		GGAAAAGAAGAGCAGCCACAT	CAACCAGCTCCTTCTCTACCC	Knapp et al. (unpublished)
a01	a01_02	GM2233b	36.87	CTT		GATTCGATCCTCTGCTGATTG	CAACCAGCTCCTTCTCTACCC	Knapp et al. (unpublished)
a01	a01_03	GA35	41.14	(AAT)18	0.4992	CAAAGTTTGCAGTGATTTTGTTG	AAATTTTCAGGTAAATCATTCTT	Ma et al. 2006
a01	a01_03	GM2724b	45.55			GGAAAAGAAGAGCAGCCACAT	CACTCTCACTTTCTCTTCTGCTT	Knapp et al. (unpublished)
a01	a01_03	GM1971b	50.9	(TCT)9	0.45978	TTTTCTCCGAACCTTCCTTTC	AAGAAAAGAAGAGCAGCCACA	Knapp et al. (unpublished)
a01	a01_03	RN17F12	52.82	(TTA)23		TCATCACACTCCAAAAGCAC	GCAGGATTCAACACCAGTAGTAG	Moretzsohn et al. 2005
a01	a01_03	Ah3TC16A10	56.32	(AG)9 (AG)7 (GT)9 (GA)6 (GA)21	0.5102	TATCGGAGAACAAGCACACATC	CTCCAAAGTCCAAACACAAACA	Macedo et al. 2012
a01	a01_03	seq8E12	56.32	(TTG)(TAA)		TCTGTTGAGAACCACCAGCA	GTGCTAGTTGCTTGACGCAC	Ferguson et al. 2004
a01	a01_04	TC3H02	62.27	(AG)5(AG)25	0.345679	CTCTCCGCCATCCATGTAAT	ATGGTGAGCTCGACGCTAGT	Moretzsohn et al. 2005
a01	a01_04	GM2723	66.07	GAA/TGAAAA		GGAAAAGAAGAGCAGCCACAT	CAACCAGCTCCTTCTCTACCC	Knapp et al. (unpublished)
a01	a01_04	GM1971	67.77	(TCT)9	0.45978	TTTTCTCCGAACCTTCCTTTC	AAGAAAAGAAGAGCAGCCACA	Knapp et al. (unpublished)
a01	a01_04	GM2724	67.77	TTC		GGAAAAGAAGAGCAGCCACAT	CAACCAGCTCCTTCTCTACCC	Knapp et al. (unpublished)
a01	a01_04	Ah3TC27H12	69.14	(AG)21	0.58681	TAACGAATGACATCAATCCCTG	TCTCACTTTGCACTCTCCTCAA	Macedo et al. 2012
a01	a01_04	Ah3TC20E08	71.44	(GT)14 (GA)24 (TG)15	0.72781	AGGCGGGACAAAGATTACATTA	AAACTGGTGGCCAAAGCTATAA	Macedo et al. 2012
a01	a01_04	seq18A08_A2	71.44	(TAA)9		TCAATTTCAAAATATTTCCACTTTCTT	GGGTTAGCATATGACCCCAA	Ferguson et al. 2004
a01	a01_04	seq4A6	71.44	(AT)19		CGCTTGCCCCACTACACTAT	AGCAGTGCTTTGCATGTACG	Ferguson et al. 2004
a01	a01_04	seq4D4	71.44	(GA)13		CGGCTGTTAGGTAATCAGTTCA	TCAACAGGAATAGCTGCACG	Ferguson et al. 2004
a01	a01_04	Ai123M2	74.34	(TA)23		GCAAGAGGGATAGGAGTTTTGA	TTCCTCAGGCTCTACAAGAAGG	Bertioli et al. (unpublished)
a01	a01_04	seq4H11_A2	75.04	(GA)26		ATCACCATCAGAACGATCCC	TTTGTAGCCTTCTGGCGAGT	Ferguson et al. 2004
a01	a01_04	TC7H09	76.34	(GA)19		AACTTTATGCCAGTCCCCTCTT	GGATGATGACAAGGGTGATTTC	Moretzsohn et al. 2005
a01	a01_04	Ah193	76.94	(AAC)5(GA)24	0.592593	CTTGCTGAAGGCAACTCCTACG	TCGGTTTGTCTCTTTGGTCACTC	Moretzsohn et al. 2005
a01	a01_04	Ah3TC36D11	76.94	(AG)21		AGAGGCTTAGAGAAGTCTTATGAAAT	CGATCTCTATCCTTGGACAATC	Macedo et al. 2012
a01	a01_04	Ah594_A3	76.94	(AAC)10		TGACCAAATCATCCCATCTTGC	CAGCACATCTCCAACTTTCTCCA	Moretzsohn et al. 2005
a01	a01_04	seq19C3	76.94	(GT)17		TCATCGCCAAACTCTTCTCC	TCGAAGAGTGCATGTTGACC	Ferguson et al. 2004
a01	a01_04	seq3E05	76.94	(CGA)4(AG)7(GA)5		CGATGAGGACAGAGACACGA	CGCTTGAACCCGACTATTTT	Moretzsohn et al. 2005
a01	a01_04	TC1D01	76.94	(GA)24		TGCCAATCTCCTCTTCAACC	TCAGGCAAGGGTTCCTACTG	Moretzsohn et al. 2005
a01	a01_04	GM641	79.53			ACGTTTCCCCAATAAGACCAC	TGGACACCTTATCGGCTTATC	Knapp et al. (unpublished)
a01	a01_05	Ah21	84.12	(GAA)9		CTTGGAGTGGAGGGATGAAA	CTCACTCACTCGCACCTAACC	Gimenes et al.(2007)
a01	a01_05	GM1661	84.12	(TTC)8	0.151629	TGCCACTCTCACTCACTTGC	CTTGGAGTGGAGGGATGAAA	Knapp et al. (unpublished)
a01	a01_05	GM1694	84.12	TCT		GCAAGAGAGAGAAACACCACA	CAACCAGCTCCTTCTCTACCC	Knapp et al. (unpublished)
a01	a01_05	TC4H02	85.65	(TC)16(CT)5	0.375	ACCGCAAACTCATCCATCTC	GATAGCGTCAGAGGCAGAGG	Moretzsohn et al. 2005
a01	a01_05	GM1992	86.25	(CT)11	0.526032	TGATGCTTGGTCAATGTATGAG	TTTCTCTGCTTGCGTCATTTT	Knapp et al. (unpublished)
a01	a01_05	GM672	86.25			GGAGAACCAGTGACGTGACATA	GGATTAATTCTGATACCATGAAAGG	Knapp et al. (unpublished)
a01	a01_05	GM2602	90.82	(GAA)7	0.700049	ACTCGATTGGGAACTGAGGAT	TCTCGTCTCTGCCATTAGTACC	Knapp et al. (unpublished)
a01	a01_05	GM2603	91.57	(GAA)6	0.578649	ACTCGATTGGGAACTGAGGAT	CGTCTCTCGTCTCTGCCATTA	Knapp et al. (unpublished)
a01	a01_05	GA110	93.26	(CT)11		GGAGAACCAGTGACGTGACATA	GGATTAATTCTGATACCATGAAAGG	Ma et al. 2006
a01	a01_05	seq15E12	96.26	(AT)11		GCAGAACTAAGGTCGGCAAG	TCCGCCCTTTATTTTTGTGT	Ferguson et al. 2004
a01	a01_05	seq16F10	97.26	(GA)28		TGGAGGGAAAAACATTTTGG	CCTGGAGGGGTGAGAGGT	Ferguson et al. 2004
a01	a01_05	seq4F01	97.26	(AG)30	0.4992	AGGGGGAGTCAAAGGAAAGA	TCACGATCCCTTCTCCTTCA	Ferguson et al. 2004
a01	a01_05	TC2D06	97.46	(AG)30	0.4992	AGGGGGAGTCAAAGGAAAGA	TCACGATCCCTTCTCCTTCA	Moretzsohn et al. 2005
a01	a01_05	ARS729	97.86		0.5	GGGATCCATGCCTTGAAAAT	CCAAATCAAAACAAACAAAACA	He et al. unpublished
a01	a01_05	ARS731	97.86		0.5	TGTCACGATTAAAAAGTTTCGG	TGGTAATTTTGCAGCATTATCTGT	He et al. unpublished
a01	a01_05	ARS721	98.16		0.5	TCAGGGTGGGTTACCAACAT	TAATCCACATTGAACCGACG	He et al. unpublished
a01	a01_06	seq12F7	100.26	(TAA)13		TGTCGTTGTAAGACCTCGGA	TTGGTTTCCTTAAGGCTTCG	Ferguson et al. 2004
a01	a01_06	TC4G05	103.57	(CT)33		AACCCACTACGGGACTACCC	ACGACGTGGAGGAGAAGAGA	Moretzsohn et al. 2005
a01	a01_06	S1	108.04	(CT)27	0.813657	TGGACTAGACAAGGAACAACCA	GAGCCATGAGCACACAACAC	Wang et al. 2007
a01	a01_06	GM613	110.34			GCGTGAAATGAGTGTTGTGAG	CATAGCCACCATAGACACCAAA	Knapp et al. (unpublished)
a01	a01_07	GA1	120.14	(AT)21		GCGTGAAATGAGTGTTGTGAG	CATAGCCACCATAGACACCAAA	Ma et al. 2006
a01	a01_07	seq13A10	120.14	(TAA)12	0.592593	AACTCGCTTGTACCGGCTAA	AGGAATAATAACAATACCAACAGCA	Ferguson et al. 2004
a01	a01_07	Ah126	120.74	(GA)8..(GA)9		CCCTGCCACTCTCACTCACT	CGTACAAGTCAGGGGGTGAC	Gimenes et al.2007
a01	a01_07	seq4B09	120.74	(AC)7		AAACATCCAGCAAACGAAGA	GACAACTAAATCCTTGTTCCTAGC	Moretzsohn et al. 2005
a01	a01_07	Ad92L24	121.34	(AT)39		TTTACCCTTGTATCTTTATGCC	TGAACACTTTACCCTTTAAACA	Bertioli et al. (unpublished)
a01	a01_07	RN11A07	121.94	(AAC)6		GGACATGAAATCAAGGGAGATG	TACATCAAGCGAAGACGAAGAA	Moretzsohn et al. 2005
a01	a01_07	Ai119C17	122.54	(AT)19		AAATGTGGAGTCAGTCTCTCCG	CAAGGCAGGACTTTTGGATTAC	Bertioli et al. (unpublished)
a01	a01_07	Ah3TC38C01	123.14	(TC)20		GACAGGTGGAGAGGGTATTCAG	GCTTGTTCATGTTCCTGCATTA	Macedo et al. 2012
a01	a01_07	IPAHM531	124.54	(TAC)7	0.2688	TGCCAGGTTGCTGTAACAAA	CATACACGCTTTTCCCCTGT	Cuc et al. 2008
a01	a01_07	RN23A07	130.64	(TC)8		CTGGATCTATCATCTTTTAATCCTCA	ACCCATACATTCAAAACTCAAAA	Proite et al. 2007
a01	a01_07	RN9A05	130.64	(TC)8		GTGCGTCTCAAAGCCATCG	CCCATACATTCAAAACTCAAAAGAGC	Moretzsohn et al. 2005
a01	a01_07	seq16G8	135.24	(TAA)18	0.345679	CTCAAAAAGCGCTTAGCCAC	CTGCCTACTGCCTACTGCCT	Ferguson et al. 2004
a01	a01_07	Ah3TC23F04_A2	139.14	(GA)20	0.23819	CACGTGTAATAGTTGCTCAAAAT	TATATGCATCAGACTCTCCAGC	Macedo et al. 2012
a01	a01_07	IPAHM177	139.94	(CA)11(CA)3(TA)4	0.5632	TCAGCGGAGAAGAAAACTAAGG	GAGGTGTTTGGAGAACTAGGATTT	Cuc et al. 2008
a01	a01_08	IPAHM287	150.74	(TG)16(AG)22	0.501458	TCTAACCCTTCGGTTCATGG	TCACTATCCCATCCCTGCTC	Cuc et al. 2008
a01	a01_09	TC2E05	162.91	(GA)23	0.375	GAATTTATAAGGCGTGGCGA	CCATCCCTTCTTCCTTCACA	Moretzsohn et al. 2005
a01	a01_09	gi-0919	164.51	(GAA)9 + (AGA)4		GACGAGGATGAGGACGAGAG	GCTACACGCTGAGTTGAGTGAG	Moretzsohn et al. 2005
a01	a01_09	TC4E10	171.01	(CCT)4(T)12(CT)14		ACGTCATCTTCCCTCCTCCT	CCATTTTCTCCTCGAACCAA	Moretzsohn et al. 2005
a01	a01_09	GM2062	175.07	GAA/AAC		GGACTTTGGGTTGGTCAAGAT	CAACCAGCTCCTTCTCTACCC	Knapp et al. (unpublished)
b01	b01_01	GM2724	0	TTC		GGAAAAGAAGAGCAGCCACAT	CAACCAGCTCCTTCTCTACCC	Knapp et al. (unpublished)
b01	b01_01	GM1971a	12.31	(TCT)9	0.45978	TTTTCTCCGAACCTTCCTTTC	AAGAAAAGAAGAGCAGCCACA	Knapp et al. (unpublished)
b01	b01_01	GM2724a	15.98	TTC		GGAAAAGAAGAGCAGCCACAT	CAACCAGCTCCTTCTCTACCC	Knapp et al. (unpublished)
b01	b01_01	GM1771	16.98	(ATC)5	0.476755	AACCCTATCGCTTGGAAGGT	CCAAAGGAGAATGGTGAGGA	Knapp et al. (unpublished)
b01	b01_02	GM2724b	24.25	TTC		GGAAAAGAAGAGCAGCCACAT	CAACCAGCTCCTTCTCTACCC	Knapp et al. (unpublished)
b01	b01_02	IPAHM171	31.41		0.375	CAACACAAGCCCACAACAAA	TCCATCATCACCCTCATCAA	Cuc et al. 2008
b01	b01_02	S54	36.91	(CA)5(GA)35		GTGTGCCATGTAGGTGTGACTG	GTTTGCCCTCTTGTTTTCTCC	Wang et al. 2007
b01	b01_03	seq9E08_B1	41.73	(TAA)	0.375	TAATAAAGGTGACGTGGCGA	TTATCATGATTACCACGACCG	Ferguson et al. 2004
b01	b01_03	GM1501	43.94	(TC)21	0.536889	TCTGCAGTGTGTGTGTGATGA	TAAGAACCAAAATTGCGACCA	Knapp et al. (unpublished)
b01	b01_03	GM635a	52.05			TTGTGCGAAGGGTAAGATAGAAA	TCCTGTGCTTGAATCTGGAAT	Knapp et al. (unpublished)
b01	b01_03	Ah3TC20E08	52.34	(GT)14 (GA)24 (TG)15	0.72781	AGGCGGGACAAAGATTACATTA	AAACTGGTGGCCAAAGCTATAA	Macedo et al. 2012
b01	b01_03	seq4A06	53.29	(AT)19		CGCTTGCCCCACTACACTAT	AGCAGTGCTTTGCATGTACG	Ferguson et al. 2004
b01	b01_03	seq19H03_B2	59.63	(TAA)18		TGGCAGGCAGTAAACATCAG	TTGAGGACGTGATGAACTGG	Ferguson et al. 2004
b01	b01_04	GM1599	61.93	(TTA)9	0.141107	CGGATACGATCATAGGAAGCA	CGCAGCAGCAAACTAACAATA	Knapp et al. (unpublished)
b01	b01_04	TC7H02	62.53	(C)12(TC)35		TCAGGATAATGACAGAGTGAGT	GGAAGAAGACCTTTGATGAG	Moretzsohn et al. 2005
b01	b01_04	Ah126	64.24	(GA)8(GA)9		CCCTGCCACTCTCACTCACT	CGTACAAGTCAGGGGGTGAC	Gimenes et al.(2007)
b01	b01_04	GM1971	64.24	(TCT)9	0.45978	TTTTCTCCGAACCTTCCTTTC	AAGAAAAGAAGAGCAGCCACA	Knapp et al. (unpublished)
b01	b01_04	GM635b	64.24			TTGTGCGAAGGGTAAGATAGAAA	TCCTGTGCTTGAATCTGGAAT	Knapp et al. (unpublished)
b01	b01_04	GM1090	65.98	(CAA)6	0.309175	GGTAAAACCTCCACCTCTGCT	CCATTTTGTTGCTGCTCCTAT	Knapp et al. (unpublished)
b01	b01_04	seq18G09	66.14	(TAA)20	0.345679	ATATCAGCGCCAATGACTCC	TCGCTCCTGGCACCTATATC	Ferguson et al. 2004
b01	b01_04	GM1331	66.27	AT	0.448251	TCAAGCAAACTGGTCAGAGAA	CAACCAGCTCCTTCTCTACCC	Knapp et al. (unpublished)
b01	b01_04	ARS756	71.77		0.497116	TAACCACAAGCAAGGCAACA	AATGGCTTCCAGAAGCTTGA	He et al. unpublished
b01	b01_04	seq13A07	72.98	(TAA)	0.671296	AATCCGACGCAATGATAAAAA	TCCCCTTATTGTTCCAGCAG	Ferguson et al. 2004
b01	b01_04	ARS727	72.98		0.481	CAACACTAAGCGAGGCACAA	GGCAGCGGCTAGATTTCTTA	He et al. unpublished
b01	b01_04	GM687	72.98			TCCACAATGTGTAGTTCAAGCA	TGGTGACCATTTCAAACTCTTG	Knapp et al. (unpublished)
b01	b01_06	Ah490	118.68					Moretzsohn et al. 2004
b01	b01_07	TC7D03	127.51	(GA)16		CCCTTTATTCACTAAGAAACATGC	CAATTTTCGGCGATCAGAG	Moretzsohn et al. 2005
b01	b01_07	Ah3TC16A10	130.67	(AG)9 (AG)7 (GT)9 (GA)6 (GA)21	0.5102	TATCGGAGAACAAGCACACATC	CTCCAAAGTCCAAACACAAACA	Macedo et al. 2012
b01	b01_07	Ah3	131.47	(GA)15(AG)7(GT)7(GA)7	0.269	TCGGAGAACAAGCACACATC	TTGCGCTCTTTCTCACACTC	Gimenes et al.2007
b01	b01_07	GM2233	131.93	CTT	0.151629	GATTCGATCCTCTGCTGATTG	CAACCAGCTCCTTCTCTACCC	Knapp et al. (unpublished)
b01	b01_07	TC1A08	132.43	(AG)30		AAGGGGTTAAGGGCATGACT	CCACAAATGGGTCGTCGAT	Moretzsohn et al. 2005
b01	b01_07	GM669	137.21	(TA)16		TGAAATGATGCAACCACACAT	AAGGGAAAGTAAAACCATGCAA	Knapp et al. (unpublished)
b01	b01_08	seq3E12	141.6					Ferguson et al. 2004
b01	b01_08	seq17E01	144.74	(TAA)	0.345679	TTCGTTGACGTGAGCGTTAC	TTAGGATTGTTCCAAGGCCA	Ferguson et al. 2004
b01	b01_08	Ap152	150.18	(TC)24		AGAGGATGCAGCGGAGTAGA	CTGGCCAATTCCTATGATCG	Palmieri et al. 2002
b01	b01_08	Ah3TC20D05	159.5	(CT)20	0.6374	CAGCACCACATGATTGTCTTTA	GATCAAACCCTCCATAATCGTA	Macedo et al. 2012
b01	b01_08	GM2606	159.5	(TC)20	0.496198	AGAAACACGCGTAGTGGAATG	TGCCGTTTACTCTCACTCACA	Knapp et al. (unpublished)
b01	b01_12	Ah11	230.94	(TTA)15		AAATAATGGCATACTTGTGAACAATC	TTCCACCAAGGCAAGACTATG	Gimenes et al.2007
b01	b01_12	GM1531	231.15	(TTG)12	0.387793	GCAGGCATGATCTTCTTTTCA	TGATATGTCCGTGACCACCTT	Knapp et al. (unpublished)
b01	b01_12	TC2E05	231.15	(GA)23	0.375	GAATTTATAAGGCGTGGCGA	CCATCCCTTCTTCCTTCACA	Moretzsohn et al. 2005
b01	b01_12	IPAHM37	236.55	(CA)10(TA)7		CGTATGCATTATAAGTGCTCGACAA	AATCCGATATCCGCTTCGAC	Cuc et al. 2008
b01	b01_12	IPAHM287	239.93	(TG)16(AG)22	0.501458	TCTAACCCTTCGGTTCATGG	TCACTATCCCATCCCTGCTC	Cuc et al. 2008
b01	b01_13	seq18B08	245.44	(TAA)11		TGGGACAGCAAGGTCTATCA	CCGTGATTGATTTCAATTTTCA	Ferguson et al. 2004
b01	b01_13	GM2607	254.62	TC	0.123855	AGAAACACGCGTAGTGGAATG	CAACCAGCTCCTTCTCTACCC	Knapp et al. (unpublished)
b01	b01_14	GM2308	268.51	(CT)11	0.372925	CTCTCTCTCCCCTTCATCGAC	GGCAGAATGAAAGGTGAGAACT	Knapp et al. (unpublished)
b01	b01_14	GM1565	268.6	(TAA)7	0.501096	CTCCGTACCTGAAATGATGAA	TGCTCACTGTTTCAACCTGAAT	Knapp et al. (unpublished)
b01	b01_14	seq16G08	273.39	(TAA)18	0.345679	CTCAAAAAGCGCTTAGCCAC	CTGCCTACTGCCTACTGCCT	Ferguson et al. 2004
b01	b01_15	TC3G01a	282.19	(TC)14(TC)12	0.345679	GACGGTAATCGTGCCCTAAA	TGCAGTAGTGGCAGCAGAAC	Moretzsohn et al. 2005
b01	b01_15	TC3G01c	283.24	(TC)14(TC)12	0.345679	GACGGTAATCGTGCCCTAAA	TGCAGTAGTGGCAGCAGAAC	Moretzsohn et al. 2005
b01	b01_15	GM1187	287.74	(GTT)5	0.444232	TGAGCCACTCACTCTCTCTGC	CAACCAGCTCCTTCTCTACCC	Knapp et al. (unpublished)
b01	b01_16	GM1899	300.44	(TC)15	0.475984	GGCTCCGATTTCTACGTTTCT	CAACCAGCTCCTTCTCTACCC	Knapp et al. (unpublished)
a02	a02_01	RI2A06	0	(GA)14		TTCCTAAACTGGAAGCGTGTTC	CAAGAGCTTTCTTCTGCCATTC	Moretzsohn et al. 2005
a02	a02_01	seq2F5	0	(TAA)17		TGACCAAAGTGATGAAGGGA	AAGTTGTTTGTACATCTGTCATCG	Ferguson et al. 2004
a02	a02_01	Ag39	2.3	(GA)22	0	TGTAGTCAGCTGCTCCAAAA	ATGAAAGTTCACTTGAGCAAA	Gimenes et al 2007
a02	a02_01	RM2H10	5.1	(ATG)7		CAAAGTGGGAGCACAAGAAACAT	TAAAGCATTGGGAGAGAACCAT	Proite et al. 2007
a02	a02_01	seq12E3	16.7	(AT)20		GACCAAAACAAAATTTGGAACA	CTCACACCAATCAGTCGACAA	Ferguson et al. 2004
a02	a02_01	IPAHM406	17.9	(GA)9(GA)8(GT)5		TGAAAGGGATTGGACCAAAA	TGTTGGACAGGATTTCACACA	Cuc et al. 2008
a02	a02_01	RI1F06	17.9	(ATA)6(ATT)4(GA)6	0.345679	TGTCTCTCTTCCTTTCCTTGCT	CCTTTTGCTTCTTTGCTTCC	Moretzsohn et al. 2005
a02	a02_01	RM13A09	17.9	(CT)6		CAAACCCACCTTTCCACTATATCAC	GGGTACATGGGAGAAATTGAAG	Proite et al. 2007
a02	a02_01	seq18B11	17.9	(GA)10		GAAGAGGCAGAGATGATGGG	AAAATTGTGTGACCGACACG	Ferguson et al. 2004
a02	a02_01	seq11G3	17.9	(CTT)28	0.345679	CCGCGTTGTTAAACCAGAAC	ATGGAGGATGTGAGTGGGAA	Ferguson et al. 2004
a02	a02_02	seq1B9	34	(GA)19	0.501458	CGTTCTTTGCCGTTGATTCT	AGCACGCTCGTTCTCTCATT	Ferguson et al. 2004
a02	a02_02	seq11G7	36.2	(TCA)17	0.375	CATGTCTCCATGAGCATTTCA	TGGATGTGGACAGCATATCG	Ferguson et al. 2004
a02	a02_03	TC4F12	41.88	(CT)23	0.554688	GATCTTTCCGCCATTTTCTC	GGTGAATGACAGATGCTCCA	Moretzsohn et al. 2005
a02	a02_03	IPAHM254	42.38	(GA)5(GA)20(GA)4	0.4992	TGAAATGGTGGCTTGCAATA	TGCTGAGTCGCTCATTCTCT	Cuc et al. 2008
a02	a02_03	GA8	42.44	(CCA)6		CTTCACCTCCAAAATCAACCA	ACCGCTGACATTTGATTGTTC	Ma et al. 2006
a02	a02_03	GM695	43.99			TGGTCGCAGATAGTATTTCTCCT	TGGAATTTGAATCGCACTCTT	Knapp et al. (unpublished)
a02	a02_03	Ah3TC28B01	44.04	(AG)31 (GA)6 (AG)24	0.83447	ATTTATTGCCAAATCTGTCGCT	CATTGCCAACTGTTACTACCCA	Macedo et al. 2012
a02	a02_03	PM32	44.04	(CT)15		AGTGTTGGGTGTGAAAGTGG	GGGACTCGGAACAGTGTTTATC	He et al. 2003
a02	a02_03	PM230	47.54	(CT)17(A)13		GCATTGCTCAATGATGAATAACA	ATCTTCCACACCGCCATTT	He et al. 2003
a02	a02_03	seq11H1	50.44	(GA)14		TTTGTGTTTAAGAAGGGGTGC	GCGGTCCAACATCCTTTTT	Ferguson et al. 2004
a02	a02_03	seq14F4	59.54	(TAA)7		ACGTTTAGTTGCTTGCGTGA	TGAATTCAAAGGAAAATGAAAAA	Ferguson et al. 2004
a02	a02_05	TC1E01	86.94	(GA)29	0.345679	CAGCAAAGAGTCGTCAGTCG	GAAAGTTCACTTGAGCAAATTCA	Moretzsohn et al. 2005
a02	a02_05	GM1469	91.59	(AAG)8	0.501096	TTGCCGTCATCTGATTCTTCT	TCTCACCGGTCTCAGTGTTCT	Knapp et al. (unpublished)
b02	b02_01	IPAHM569	0	(TG)23T5	0.4992	ATTGGTGGATATCGGACTCG	CCTATCCTTCAAGGCTTCTCG	Cuc et al. 2008
b02	b02_01	GM625	3.3			CCTCACTTCTTTTTGCATGGT	TGGAAAGGAAATGATTTGGTG	Knapp et al. (unpublished)
b02	b02_01	seq14G03	9.7	(TC)36		CAATTTTATTTGCCACATGCT	TCGCAGTTCTCAAAGTTATCG	Moretzsohn et al. 2005
b02	b02_01	gi_0342	12	(TAA)5(AAG)4		AGTGATGATGATGAAGATGT	CCTTCTGTCTGAAACCAT	Moretzsohn etal. 2005
b02	b02_03	RI2A06	48	(GA)14		TTCCTAAACTGGAAGCGTGTTC	CAAGAGCTTTCTTCTGCCATTC	Moretzsohn etal. 2005
b02	b02_03	seq2F05	49.3	(TAA)17		TGACCAAAGTGATGAAGGGA	AAGTTGTTTGTACATCTGTCATCG	Ferguson et al. 2004
b02	b02_03	TC1E01	56.9	(GA)29	0.345679	CAGCAAAGAGTCGTCAGTCG	GAAAGTTCACTTGAGCAAATTCA	Moretzsohn et al. 2005
b02	b02_03	Ag39	56.9	(GA)22	0	TGTAGTCAGCTGCTCCAAAA	ATGAAAGTTCACTTGAGCAAA	Gimenes et al 2007
b02	b02_03	Ah3TC13E05	56.9	(TC)23	0.71178	TCCTCTGCTTCCTCTGTTTCTT	TGGCTGTGGCTTTAGGGTATAG	Macedo et al. 2012
b02	b02_03	seq14D11	57.1	(TAA)27		ACGCTAGTCCCTTTGCTTTG	AAACAATCCTTTCTTTGGATGG	Ferguson et al. 2004
b02	b02_05	RI1F06	80.3	(ATA)6(ATT)4(GA)6	0.345679	TGTCTCTCTTCCTTTCCTTGCT	CCTTTTGCTTCTTTGCTTCC	Moretzsohn et al. 2005
b02	b02_05	PM32	99.7	(CT)15		AGTGTTGGGTGTGAAAGTGG	GGGACTCGGAACAGTGTTTATC	He et al. 2003
b02	b02_06	IPAHM167	102.3	(GA)17	0.54	CACTCCCCATCAAAACTAACAG	TTCCTCCTTCCCCAAGAGAT	Cuc et al. 2008
b02	b02_06	seq18E07	110.2	(TAA)20	0.554688	AACGTGCGTGGAAAGAGTTC	TGAGAGTGGTTTTTGTTGGTG	Ferguson et al. 2004
b02	b02_06	TC1B02	115.1	(CT)25	0.743827	AACATGCATGCAAATGGAAA	GCCAAAGTCACTTGTTTGCTT	Moretzsohn et al. 2005
b02	b02_06	GM1538	116.8	(GAA)7	0.512888	AGCTCCAGAGGCAAAGAAAAC	TGCATAGTGATGGTTCCTTCC	Knapp et al. (unpublished)
b02	b02_07	IPAHM524	127.35	(GA)20AA(GA)3	0.699708	GCCATGGATAAGAACCTGAAA	AGTAAGCTGAGCTGGCAGA	Cuc et al. 2008
b02	b02_07	TC9F04	130.21	(TC)23	0.324865	CCTAAACAACGACAAACACTCA	AAGCACAACACAGAACCCTAAA	Moretzsohn et al. 2005
b02	b02_07	GM2196	131.21			CCTTGCTTTTCGGCTTCTATT	GAGCTTTGGCTTTTGTTGTTG	Knapp et al. (unpublished)
b02	b02_07	seq2D12B	134.63	(TAA)12	0.5632	AAGCTGAACGAACTCAAGGC	TGCAATGGGTACAATGCTAGA	Ferguson et al. 2004
b02	b02_07	PM499	135.93	(CT)11	0.304688	TCCCTTCTAAACACGAAATGG	ACTGAATGGAGAAAAGAGTGTGG	He et al. 2003
b02	b02_08	seq1B09	143.43	(GA)19	0.501458	CGTTCTTTGCCGTTGATTCT	AGCACGCTCGTTCTCTCATT	Ferguson et al. 2004
b02	b02_08	Ah26	150.63	(CT)14	0.312	GAAAATGATGCCATAAAGCGTA	AGTGTAACACCCCGTTAGCC	Gimenes et al.2007
b02	b02_08	AC2C05	150.63	(TG)17		CAAGGAAGCGTGAATTGTTAG	TGTGGACTATGCTTGTCATGTT	Moretzsohn etal. 2005
b02	b02_08	seq7B03	154.73	(CTT)9		TCTGTTTTCTCGTTCGAGCTG	ACCCACCTAGCATCATTTGC	Ferguson et al. 2004
b02	b02_08	PM73	155.23	(GA)16	0.375	AGTGTTGGGTGTGAAAGTGG	GGGACTCGGAACAGTGTTTATC	He et al. 2003
b02	b02_08	seq2G04	155.23	(TAA)23	0.2688	TTCTTGGTTCCTTTGGCTTC	TGCTCAAGTGTCCTTATTGGTG	Ferguson et al. 2004
b02	b02_08	RN0x615	158.73	(TAT)11		GGGCATTTAAGGGACAATGG	CCCGACCCACACATTTAACATA	Moretzsohn etal. 2005
b02	b02_08	seq11H01	159.31	(CT)8		GCTATAAGCGGGTACTTTCTCTTT	TTCCAGTTATTGTTTTCATCACC	Moretzsohn et al. 2005
b02	b02_09	seq4E08	162.81	(TC)16(TA)15	0.375	ACCATTGCACTTTGAAGCTCT	GCTTGGTTTGGGTTAGTTTGA	Moretzsohn et al. 2005
a03	a03_01	GM2325	0	(AAAT)6	0.475984	TCCCTAAAATAATTTCTGCCAAA	TCTTTTCTTCTGCTCCCCTTT	Knapp et al. (unpublished)
a03	a03_01	GM2007	19.4	(TC)13	0.423515	GGGCCTCTATTTCCTTCCTTT	TTGGGATTCTTGGATCAGATG	Knapp et al. (unpublished)
a03	a03_02	TC7E04	31.75	(AG)16	0.672	GAAGGACCCCATCTATTCAAA	TCCGATTTCTCTCTCTCTCTCTC	Moretzsohn et al. 2005
a03	a03_03	GM2691	58.95	(CT)9	0.309175	GAGAAGCTCGAATCCGTGTAA	TTGCCTGCTTCTTCTCTTCAC	Knapp et al. (unpublished)
a03	a03_04	GM2347	63.5	(GA)8	0.141107	GGAGGGACGATTAGCATTTTC	TTCCTTCATCGAAGCTACCTG	Knapp et al. (unpublished)
a03	a03_04	Ah3TC40A02	75.69	(CT)20	0	AAAATAACGACCACCTCCTTAAC	GTTGTTGGCGAAAGAATAAGAA	Macedo et al. 2012
a03	a03_04	TC3E02	76.29	(CT)26(CA)7(CA)5	0.324865	TGAAAGATAGGTTTCGGTGGA	CAAACCGAAGGAGGAACTTG	Moretzsohn et al. 2005
a03	a03_04	seq4F10	77.89	(TG)7(GA)8		TGCGAAACCCCTAACTGACT	TCTATGTTGCTGCCGTTGAC	Moretzsohn et al. 2005
a03	a03_05	seq9H8	81.83	(TAA)20	0.2688	CTGGATACATCGACGCTGAG	GCGGTCCAATACTAACAAAATC	Ferguson et al. 2004
a03	a03_05	seq3D9	87.68	(GA/GT)19		TTCACCCGTACAAACCAGTG	CCTCGGCAGATCTGGAGTAA	Ferguson et al. 2004
a03	a03_05	Ah3TC22G05	91.68	(TC)14 (CT)7	0.57	TATACTCTGATTTTCCCGCCAT	GAGCCATTCGATTAAGCTGTG	Macedo et al. 2012
a03	a03_05	seq13E6A	91.68	(TAA)10	0.375	TGGCAATTTATTGATGCAGG	GTCACGTAATTGGATGCACG	Ferguson et al. 2004
a03	a03_05	Ag140	92.28	(GA)28	0	CAGCATTCAATTCAGTTTCG	TCAACCTCGAACACACAAAA	Gimenes et al 2007
a03	a03_05	TC11E04	92.28	(AG)23		ACGACACCCTGAAATCAAGTTT	CCGAAGGCACCAAAAAGTAT	Ferguson et al. 2004
a03	a03_05	TC1E06	92.28	(TC)21		ACCGTTACGAACGCTTTGTC	TCCCTCTCATACGACACCCT	Moretzsohn et al. 2005
a03	a03_05	seq19D9	92.44	(TAA)18	0.345679	TGTTGCCCACTGTTCTAATCA	TCAAATGGCATAGTCTCCCC	Ferguson et al. 2004
a03	a03_06	seq18G9_A2	110.07	(TAA)20		ATATCAGCGCCAATGACTCC	TCGCTCCTGGCACCTATATC	Ferguson et al. 2004
a03	a03_06	Ah3TC39C01	111.87	(GA)19	0.6712	AGGCGCGGTGATAGAAAAC	GTTTTGCTGTTCGTCCCTAAAC	Macedo et al. 2012
a03	a03_06	Ah636	111.87	(AAC)5		TCCCTTTTTACTAGCCCGCAAC	TTTCCGTCAGGTTCTGCTCTTG	Moretzsohn et al. 2005
a03	a03_07	seq4F7	126.1	(GA)18		ATGCCACTTCCGTTTGCTAC	TTGCTTTGGCCACTGAAAAT	Ferguson et al. 2004
a03	a03_07	seq19G7	130.8	(GA)22	0.672	ATTCAATTCCTCTCTCCCCC	TCAATCAATCAATCGCAGGA	Ferguson et al. 2004
a03	a03_07	PM434	138.6	(CT)14	0.672	TTCGGCTGACAGCTCTAAG	GAAAGAAATTATACACTCCAATTATGC	He et al. 2003
a03	a03_08	GM1717	142.62	TC		TGCGAGTGTGTTGATTCCTT	CAACCAGCTCCTTCTCTACCC	Knapp et al. (unpublished)
a03	a03_08	seq18A5	146.49	(AT/TAA)17	0.375	TGATTCGATTTACTCATGCACA	GAGGATTCTTGAGCCTCGAC	Ferguson et al. 2004
a03	a03_08	GM745	149.89	(TC)8	0.309175	CATTAGAGTTTCCCCACTTTCG	CAACCAGCTCCTTCTCTACCC	Knapp et al. (unpublished)
a03	a03_08	seq18A5	149.89	(AT/TAA)17	0.375	TGATTCGATTTACTCATGCACA	GAGGATTCTTGAGCCTCGAC	Ferguson et al. 2004
a03	a03_08	PM238	157.59	(CT)11	0.345679	CTCTCCTCTGCTCTGCACTG	ACAAGAACATGGGGATGAAGA	He et al. 2003
a03	a03_08	seq15F12	158.4	(GA)21	0.672	AAAGTCAACCGCTCACACTG	AGGGTTAGGATTTTGGGTGG	Ferguson et al. 2004
a03	a03_09	gi-4925	168.2	(ATT)13	0.29	AAACTTGTATGTGTAGCAGACC	GGTGAAAAATCGGAAAGA	Moretzsohn et al. 2005
a03	a03_09	GM2402	168.37	(GA)12	0.141107	CAGAGTAGGCAACATCCTTGG	GCGCTTTACCAACTCACACTC	Knapp et al. (unpublished)
a03	a03_09	ARS749	178.97		0.5	TTCTCATGCTGCTGCTTTTT	CCATTTTAGCCAATTCTTTTTACA	He et al. unpublished
a03	a03_09	Ah4-04	178.97	(GA)19	0.345679	CGATTTCTTTACTGAGTGAG	ATTTTTTTGCTCCACACA	Moretzsohn et al. 2005
a03	a03_09	AC3D07	179.47	(TG)29	0.345679	TAGCTTCGATAACCAGGGAGAC	CCCTAACACTCGTTCATTCCTC	Moretzsohn et al. 2005
a03	a03_10	PM42_A2	185.02	(GA)3GAAA(GA)14		ACGGGCCAAGTGAAGTGAT	TCTTGCTTCTTTGGTGATTAGC	He et al. 2003
a03	a03_10	TC0A01	186.22	(AG)29	0.345679	CAGCTCATTTTTCACCTCCA	CCATAACCCCAAAAATGCAG	Moretzsohn et al. 2005
a03	a03_10	ARS761	187.52		0.4984	TCAATTTCTTTCTGTTGTTGCAC	TGGGAGCAGAAAATCAGCTT	He et al. unpublished
a03	a03_10	PM15	187.52	(GAAA)3(GA)8(GA)9		CCTTTTCTAACACATTCACACATGA	GGCTCCCTTCGATGATGAC	He et al. 2003
a03	a03_10	ARS744	187.82		0.4997	GGCAAATTTTTCACCTAGCG	TCAATACTTTCGTTGCATGGAT	He et al. unpublished
a03	a03_10	PM201	187.82	(CT)19		CCTTTATAGAGGACCTTCCCTCTC	GCCTATTTGGTATCGGCTCA	He et al. 2003
a03	a03_10	TC0A02	188.92					Moretzsohn et al. 2005
a03	a03_10	PM3	190.43	(GA)14	0.554688	GAAAGAAATTATACACTCCAATTATGC	CGGCATGACAGCTCTATGTT	He et al. 2003
a03	a03_10	seq2C11	190.43	(TAA/CAC)17	0.375	TGACCTCAATTTTGGGGAAG	GCCACTATTCATCGCGGTA	Ferguson et al. 2004
a03	a03_10	IPAHM288	194.36	(GA)4AA(GA)2	0.4992	AAGTGAATTTGGGGATGCTG	CTCCACCACTGCCACTATCA	Cuc et al. 2008
a03	a03_10	RM15H7	197.88	(AG)9		TAAAGTGGCAGAGTGTTGTTGG	GTCAAAGTAATCAGAACCGATGG	Proite et al. (2008)
a03	a03_10	ARS758	198.58		0.4925	GAAGCTTTCCATGCACCAGT	TGAATCCAACAACCACAGGA	He et al. unpublished
a03	a03_10	TC2C07	199.7	(CT)23	0.3648	CACCACACTCCCAAGGTTTT	TCAAGAACGGCTCCAGAGTT	Moretzsohn et al. 2005
a03	a03_11	TC11F12	205	(AG)22	0.535494	TGAGTCTGTGGAAGAATAAGAGAAG	TGAGTCTATCGCCGCCTAC	Moretzsohn et al. 2005
a03	a03_11	GM2027	205.6	CTG		CAAATAAAATTGGTTGGGGTCT	CAACCAGCTCCTTCTCTACCC	Knapp et al. (unpublished)
a03	a03_11	Ah3TC41C11	208.73	(AG)25	0.69112	CACCAGAAAACATGAGAGCAAA	CATCCACCTTCGTGTTAACCTC	Macedo et al. 2012
a03	a03_11	GM618	209.56			TGAAGGGAGGAAGAGACGAAT	CCTCTGTGCGACATGACTCTAA	Ma et al. 2006
a03	a03_11	Ah30	209.64	(GA)9	0	TGCTCTTCTTTTCCTTTTCAC	AACGGCCAAAACTGAAATTA	Moretzsohn et al. 2005
a03	a03_12	TC4F02	223.43	(C)14	0.345679	GCACTGCACCCCAATCTCTA	GATGGGTGGTTTGGTGTCTC	Moretzsohn et al. 2005
a03	a03_12	GM2215	231.73	(GA)8	0.559317	GAAATCGGAGTCGGAGAGGT	TCCCCTTCTTTCTTCGTTCTT	Knapp et al. (unpublished)
a03	a03_12	ARS747	232.43		0.4889	AATGCGTCATTTAGGCAAGG	GCTCTGCATGGTAGGGTGTT	He et al. unpublished
a03	a03_12	GM2528	235.64	(AGT)6	0.539619	TGCAAACTCAGTAGGAGCCATA	GCCAAACAGTAGAAGCTGGTG	Knapp et al. (unpublished)
a03	a03_12	seq19H3_A1	237.35	(TAA)18		TGGCAGGCAGTAAACATCAG	TTGAGGACGTGATGAACTGG	Ferguson et al. 2004
a03	a03_12	IPAHM295	239.1	(GA)20	0.375	TGCTGGAATGGTAACTTTGCT	TAACCCCCTTCACTCCCTCT	Cuc et al. 2008
a03	a03_13	gi-0560	240.23	(ACA)5(TCA)4		GGTGGAGGATTTTGGTGAATA	GCAAGAAAGCATAGTAGTTAGCAGTC	Moretzsohn et al. 2005
a03	a03_13	ARS736	240.9		0.4999	TCCCCACCAAGTACAGTCATC	ATGTTGAGTGTGGGTGGGAT	He et al. unpublished
a03	a03_13	seq13E6A	244	(TAA)10	0.375	TGGCAATTTATTGATGCAGG	GTCACGTAATTGGATGCACG	Ferguson et al. 2004
a03	a03_13	TC4G02	249.39	(TC)27	0.743827	GATCCAACTGTGAATTGGGC	CACACCAGCAACAAGGAATC	Moretzsohn et al. 2005
a03	a03_13	GM2206	252.1	(AG)14	0.502508	TTCCTTCTCCAAAGTCCAAGC	GGAGGAGGGATGTAAGTACGG	Knapp et al. (unpublished)
a03	a03_13	GM1954	254.71	(GA)11	0.568866	GAGGAGTGTGAGGTTCTGACG	TGGTTCATTGCATTTGCATAC	Knapp et al. (unpublished)
a03	a03_13	Ah3TC31H02	256.43	(GA)20	0.74793	AGTCATGTCCATTTCATATACAG	TTTTGGACTTACACCCTCTA	Macedo et al. 2012
a03	a03_14	IPAHM103	272.52	(CA)3(GA)17	0.4992	GCATTCACCACCATAGTCCA	TCCTCTGACTTTCCTCCATCA	Cuc et al. 2008
b03	b03_01	GM1854	0	TC		CCCCAACCCTTTCTTTCTCTT	CAACCAGCTCCTTCTCTACCC	Knapp et al. (unpublished)
b03	b03_01	Ah3TC23E04	6.55	(GA)24	0.71875	TGGGTATCAAACAAAACAAGAGG	TCAAAGACAAACACCAAAACCTT	Macedo et al. 2012
b03	b03_01	Ah3TC29H08	8.15	(CT)20	0.51653	ATAGAGTGCTCCACACACACCC	TAATCGGAAGACCTTTACGACG	Macedo et al. 2012
b03	b03_01	TC2A02	8.55	(CT)32	0.345679	CTCCCTTGTGGGTATGTGGT	GGCTCCCATTCATTCTCAAA	Moretzsohn et al. 2005
b03	b03_01	TC3E02	10.15	(CT)26(CA)7(CA)5	0.324865	TGAAAGATAGGTTTCGGTGGA	CAAACCGAAGGAGGAACTTG	Moretzsohn et al. 2005
b03	b03_02	TC2A02b	23.75	(CT)32	0.345679	CTCCCTTGTGGGTATGTGGT	GGCTCCCATTCATTCTCAAA	Moretzsohn et al. 2005
b03	b03_02	TC2A02a	28.1	(CT)32		CTCCCTTGTGGGTATGTGGT	GGCTCCCATTCATTCTCAAA	Moretzsohn et al. 2005
b03	b03_02	seq14C11	33.75	(TAA)7		CGTTGGGGACAAAAACGATA	TTTTCTTGAAACTCGTTGATATGG	Ferguson et al. 2004
b03	b03_03	TC4E10	58.85	(CCT)4 + (T)12 + (CT)14		ACGTCATCTTCCCTCCTCCT	CCATTTTCTCCTCGAACCAA	Moretzsohn et al. 2005
b03	b03_04	seq15D03	70.53	(GA)11		CATGCCATCATCACAACACA	GGAGGAAGCAATGGTTTCAG	Ferguson et al. 2004
b03	b03_04	seq19D09	72.19	(TAA)18	0.345679	TGTTGCCCACTGTTCTAATCA	TCAAATGGCATAGTCTCCCC	Ferguson et al. 2004
b03	b03_04	TC7E04	74.7	(AG)16	0.672	GAAGGACCCCATCTATTCAAA	TCCGATTTCTCTCTCTCTCTCTC	Moretzsohn et al. 2005
b03	b03_04	GM1502	78.36	(TC)19	0.736553	TTCCTTTACACACACGCACAC	TGGAGGAAATGTAGGGAAAGG	Knapp et al. (unpublished)
b03	b03_05	IPAHM93	95.06	(CT)15		TCCATCGTTAGTGGCACTGT	GTCGACTCCTGCCCAATCTA	Cuc et al. 2008
b03	b03_06	SC1003E1	103.96
b03	b03_07	GM1762	133.86	AT		ATTGTTTGCTTCCCAAATTCC	CAACCAGCTCCTTCTCTACCC	Knapp et al. (unpublished)
b03	b03_07	GM1733	139.92	AT		AATGTCAAGGCTGCTCAAGA	CAACCAGCTCCTTCTCTACCC	Knapp et al. (unpublished)
b03	b03_08	seq2C11	140.92	(TAA/CAC)17	0.375	TGACCTCAATTTTGGGGAAG	GCCACTATTCATCGCGGTA	Ferguson et al. 2004
b03	b03_08	GM1883	141.32	(TCT)8	0.1638	ACCCTTCTTCTCCACATCCAC	GGTTTGGGGCTTAACAGAGAC	Knapp et al. (unpublished)
b03	b03_08	ARS788	145.51		0.4999	CGCTGCTAATTTATTATGGCAA	TGTAGCCTTAGGTCCCTTATTTTT	He et al. unpublished
b03	b03_08	seq14C11-1	146.75	(TAA)7		CGTTGGGGACAAAAACGATA	TTTTCTTGAAACTCGTTGATATGG	Ferguson et al. 2004
b03	b03_08	PM31	155.82	(CT)15	0	TTCGGCATGACAGCTCTAAG	GAAAGAAATTATACACTCCAATTATGC	He et al. 2003
b03	b03_08	PM3	156.4	(GA)14	0.554688	GAAAGAAATTATACACTCCAATTATGC	CGGCATGACAGCTCTATGTT	He et al. 2003
b03	b03_08	RM14H12	159.3	(TA)6		CTCCTGAGATCCGAAAGCTACTC	AAGCAATGGCACGGTAGATACT	Proite et al. 2007
b03	b03_09	seq9E08_B2	161.43	(TAA)19	0.375	TAATAAAGGTGACGTGGCGA	TTATCATGATTACCACGACCG	Ferguson et al. 2004
b03	b03_10	seq19H03_B1	183.33	(TAA)18		TGGCAGGCAGTAAACATCAG	TTGAGGACGTGATGAACTGG	Ferguson et al. 2004
b03	b03_10	PM201	190.13	(CT)19		CCTTTATAGAGGACCTTCCCTCTC	GCCTATTTGGTATCGGCTCA	He et al. 2003
b03	b03_10	EM_152	190.13	(AGC)6		GGCGACAAAGACAAGAAGGAA	GCCACCACCATAGCCATACC	Liang etal, 2009
b03	b03_10	GM1618	196.63	TC		CTGAATCCATTTTGGTCCTCA	CAACCAGCTCCTTCTCTACCC	Knapp et al. (unpublished)
b03	b03_11	Ah3TC40C03_B1	200.7	(GA)26		TTGTTTGCTTTGTAAAATAGGTTGAC	AAATAATCTCAGCCAAGGCGTA	Macedo et al. 2012
b03	b03_11	GM626	201.54			CATCCAAAGCCAAAGTTCACA	GCTTAGCTTGCTTTGATTAGGG	Knapp et al. (unpublished)
b03	b03_11	TC1E06	202.71	(TC)21		ACCGTTACGAACGCTTTGTC	TCCCTCTCATACGACACCCT	Moretzsohn et al. 2005
b03	b03_11	RN17B08	204.48	(AAC)5		CGACACAGAAAAGAACCACAGA	TGCCATAAACAAGCAAGAAGAG	Moretzsohn etal. 2005
b03	b03_11	PM238	204.48	(CT)11		CTCTCCTCTGCTCTGCACTG	ACAAGAACATGGGGATGAAGA	He, et al. 2003
b03	b03_11	GM1996	204.48	(CAA)19	0.72618	CATCCCATCATTTTCCCTCTT	TACAGTGAAGGTGGGATCCTG	Knapp et al. (unpublished)
b03	b03_11	GM2053	204.48	(TCT)5, (TGATTC)3	0.65191	ACAAGGAAAACCCATCCAATC	ACGTGATGGATTCTTGTGGAG	Knapp et al. (unpublished)
b03	b03_11	RM14E11	205.08	(GA)7		CCATCCAATCAGCAATCACTAA	GAAGAAGAAGAGGAATGCCAGA	Proite et al 2007
b03	b03_11	seq16C06	207.38	(GA)18	0.375	TTGCTACTAAGCCGAAAATGAAG	CTTGAAATTAACACATATGCACACA	Ferguson et al. 2004
b03	b03_11	PM434	208.78	(CT)14		TTCGGCTGACAGCTCTAAG	GAAAGAAATTATACACTCCAATTATGC	He, et al. 2003
b03	b03_11	AC1G11	211.08	(TA)5(TG)27		CCTTTTTCTTTCAAGGCTCCTA	TTCGTAAATCAGAGGTGGTGAG	Moretzsohn et al. 2005
b03	b03_11	GM2069	211.11	(TGC)8, (CAT)8	0.291783	TTCAGCCATTGACAGTCCTCT	GCAATGCATCAAGTTTTCCAA	Knapp et al. (unpublished)
b03	b03_11	GM2308	215.36	(CT)11	0.372925	CTCTCTCTCCCCTTCATCGAC	GGCAGAATGAAAGGTGAGAACT	Knapp et al. (unpublished)
b03	b03_12	seq13E09	222.85	(TAA)16	0.2688	GGAGGAGGACGACGATGATA	TGTCGTCTCATCCAAAGGAA	Ferguson et al. 2004
b03	b03_12	GM2688	225.47	AGC		GACAAGAAGGAAGGCAGTCAA	CAACCAGCTCCTTCTCTACCC	Knapp et al. (unpublished)
b03	b03_12	GM1083	229.17	(CTA)6	0.21491	CTTCAAGCCCAGAATCACAAG	TTGATGGTGATGGAAACAGTG	Knapp et al. (unpublished)
b03	b03_12	seq3F05	230.07	(GA)21	0.375	TTCAGTTGTGATTCCACCCC	TTACATGGCCACTGACTAGAAGTT	Ferguson et al. 2004
b03	b03_12	Ah-590	231.44	(TTC)8(TTC)4(CTT)10(TTC)4(TCT)4(CTT)5(TTC)4(GAA)4		CAAAACGCAATGCAAGGTACG	ACGAACGTGCAGCAAGAAGAAG	Moretzsohn et al. 2005
b03	b03_12	seq2H08	234.46	(TAA)29		AAGCTAAGTGGGGTGGGAGT	AAGCAGTTTGCGTAAGCATTT	Ferguson et al. 2004
b03	b03_12	GM2388	235.04	(TAT)5	0.343405	GTGAGGAGCATCTTGTGTGGT	GAACTTCTTGCAAGGGAACAA	Knapp et al. (unpublished)
b03	b03_12	GM2687	236.14	GCT		GACAAGAAGGAAGGCAGTCAA	CAACCAGCTCCTTCTCTACCC	Knapp et al. (unpublished)
b03	b03_12	seq16F01	236.51	(TAA)25		TGCTTCCATCAGCTTTTCCT	AAATGAGGGCCTCCAAAGTT	Ferguson et al. 2004
b03	b03_12	seq2B10	236.51	(TAA)16	0.592593	AATGCATGAGCTTCCATCAA	AACCCCATCTTAAAATCTTACCAA	Ferguson et al. 2004
b03	b03_13	TC4G02	240.41	(TC)27	0.743827	GATCCAACTGTGAATTGGGC	CACACCAGCAACAAGGAATC	Moretzsohn et al. 2005
b03	b03_13	seq2E06	249.12	(GA)12	0.345679	TACAGCATTGCCTTCTGGTG	CCTGGGCTGGGGTATTATTT	Ferguson et al. 2004
b03	b03_13	GM1954	251.02	(GA)11	0.568866	GAGGAGTGTGAGGTTCTGACG	TGGTTCATTGCATTTGCATAC	Knapp et al. (unpublished)
b03	b03_14	IPAHM103	264.22	(CA)3(GA)17	0.4992	GCATTCACCACCATAGTCCA	TCCTCTGACTTTCCTCCATCA	Cuc et al. 2008
b03	b03_14	GM2079	268.42	(CAG)6	0.375	GGCCAAGGAGAAGAAGAAAGA	GAAGGAGTAGTGGTGCTGCTG	Knapp et al. (unpublished)
b03	b03_14	GM2301	269.82	(TGC)7	0.406497	GTAACCACAGCTGGCATGAAC	TCTTCAAGAACCCACCAACAC	Knapp et al. (unpublished)
b03	b03_14	GM1536	271.92	CT		AAAGCCCTGAAAAGAAAGCAG	CAACCAGCTCCTTCTCTACCC	Knapp et al. (unpublished)
b03	b03_15	GM2009	282.02	(AG)16	0.774637	CAAACGCATACACCCCATAAC	TTTGGTTCTCGTTTGTGTTTT	Knapp et al. (unpublished)
a04	a04_01	GM1062	0	(AAG)5	0.309175	AAGAAAAGGAGGCATGAGAGG	TTTCAATTGGGCTTCATCATC	Knapp et al. (unpublished)
a04	a04_01	seq2C10	7.68	(GA)9		GCAAGTCACATAGTTCAATTTTGG	GGCATAGCCATCCAAATCAT	Ferguson et al. 2004
a04	a04_01	PM427	8.7	(CT)7	0.345679	CAGCGGCAACAGTTTTGATG	GAAAAGTATGCCGCCGTTG	He et al. 2003
a04	a04_01	ARS772	10.08			TTTTTCTGGACCAAGCCTCT	TGAATTCGGGCTACTGATCC	He et al. unpublished
a04	a04_01	TC7G10	12.58	(GA)17		AATGGGGTTCACAAGAGAGAGA	CCAGCCATGCACTCATAGAATA	Moretzsohn et al. 2005
a04	a04_01	PM375	15.58	(CT)10	0.345679	CGGCAACAGTTTTGATGGTT	GAAAAATATGCCGCCGTTG	He et al. 2003
a04	a04_01	LG111	16.78					Nelson et al. 2006
a04	a04_01	Ap40	17.38	(TC)17	0.246	CTGTTTGATCGCCGCTATG	GTCAAGTGCTTCCTCCGATG	Palmieri et al. 2002
a04	a04_01	GM736	18.58			GTGAAGGAGAACCTCGACACA	TCTCATTCCATTGATCCTTGC	Knapp et al. (unpublished)
a04	a04_01	GM629	19.38			CAAGAGGGACGGATAATAGCA	GACGCAAGGAAATGAGCATAC	Knapp et al. (unpublished)
a04	a04_02	GM890	23.23	TC		CATGGCTTCCCATTCTTCTTA	CAACCAGCTCCTTCTCTACCC	Knapp et al. (unpublished)
a04	a04_02	S109	23.73	(AG)21		AAGGGAGCACAATCATA	GAGCACGAGTTCATACAC	Wang et al. 2007
a04	a04_02	TC3H07	25.8	(GA)20(TTC)4	0.345679	CAATGGGAGGCAAATCAAGT	GCCAAATGGTTCCTTCTCAA	Moretzsohn et al. 2005
a04	a04_02	GM2246	26.43	(TC)15	0.375	GCAATTTATGTGCACCCTTTT	CGCTTGACACCAATGAAGTCT	Knapp et al. (unpublished)
a04	a04_02	TC11B04	31.6	(GA)20	0.592593	GATCTGAAGGCTCTGATACCAT	GATCTCAACCAGAACAGTATGC	Moretzsohn et al. 2005
a04	a04_02	ARS726	34.81			GTGTCCGAATCTTTCACGGT	CGACATTAAAATGCCCGAAT	He et al. unpublished
a04	a04_02	GM1720	37.49			GCAGTTGAAAGTGTGAAAGCA	CAACCAGCTCCTTCTCTACCC	Knapp et al. (unpublished)
a04	a04_03	Ah229	40.22	(ACT)6 + (TCT)9		GCAAACATCTTCCTTCCCAACA	ATTGACGTAAGCTGCCAAGAGG	Moretzsohn et al. 2005
a04	a04_03	ARS811	45.64			TGAGCTGTTATGTTTTCTCTGGG	AAATTCCAAGCCAAACACCA	He et al. unpublished
a04	a04_03	IPAHM105	45.64	(CT)18	0.375	CAGAGTTTGGGAATTGATGCT	GCCAGATCTGAGCAAGAACC	Cuc et al. 2008
a04	a04_03	GM2589	48.36	(TC)12	0.520721	TTTCAGCTACCCTTCTTCCAAA	CAAAAGTGAACCCCGTAAGAA	Knapp et al. (unpublished)
a04	a04_03	GM1897	48.89	(GAA)7	0.2688	GCGGTTTCTGGTAGCTTGAA	CCAGGGACACAAACAGAAGAA	Knapp et al. (unpublished)
a04	a04_03	S118	57.3	(AAT)6	0.64265	TATATGATGCTTGATTGAGACT	CATGTAGAAGGCTTGGAGGGTAT	Wang et al. 2007
a04	a04_03	GM1867	57.35			GAGCAGACATGGTTGAATGGT	CACCTCAACGAAGAACTCAGC	Knapp et al. (unpublished)
a04	a04_03	GM955	58.69	(CAG)6	0.355713	TTCCCTAACGAACCTCCCTAA	CATCGGAGCGTACCTACTCAG	Knapp et al. (unpublished)
a04	a04_04	TC9E08b	64.41	(GA)10		GAAACAGCCGCGAGAGAA	CCCTAACCTCTCTTCATTGTGC	Moretzsohn et al. 2005
a04	a04_04	GM1919	69.1	(AG)14	0.291783	TGGAAGGGGTCAGAAGAAGTT	CCGTGTCTCTCTCTTTCTCTCC	Knapp et al. (unpublished)
a04	a04_04	GM2480	71.4	TC		AGCGCCTTCTTTTGTCTCTCT	CAACCAGCTCCTTCTCTACCC	Knapp et al. (unpublished)
a04	a04_04	seq15C12	71.4	(TAA)28	0.5632	ACAATGCAATGACCGTTGTT	TTGTTGCATGAGAACGTGAA	Ferguson et al. 2004
a04	a04_05	seq12E10	97.3	(TAA)14		TGCTTTTAGAGGCTTTGCCA	GAAACTGCAACAGCAACAGAA	Ferguson et al. 2004
a04	a04_05	GM1311	98.4	(ATT)5	0.226607	CACATGATGATGGATCTTTGTTC	AACCATGACACCAGCTACACC	Knapp et al. (unpublished)
a04	a04_06	RM17H09	101.39	(AT)(TAA)	0.2688	TGATTCGATTTACTCATGCACA	GAGGATTCTTGAGCCTCGAC	Ferguson et al. 2004
a04	a04_06	RN35B05	102.29	(AG)12 + (GT)9		CGCCGGGGACAGATGAGAC	AAGCAACGGAGTAGAAGGGAAC	Proite et al. 2007
a04	a04_06	seq18A8_A3	102.29	(TAA)9		TCAATTTCAAAATATTTCCACTTTCTT	GGGTTAGCATATGACCCCAA	Ferguson et al. 2004
a04	a04_06	seq3B10	102.29	(GA)16		GGTGATGCTCCCCTCTACAA	CCTGCGAAACACAACAGAAA	Ferguson et al. 2004
a04	a04_06	gi-0832	102.29	(ATT)10	0.26	GCCACTTTATTCTAAGCACTCC	AAGAGACCACACGCTCACA	Moretzsohn et al. 2005
a04	a04_06	Ah3TC39B04	102.99	(CT)10 (CT)11	0.64	ATCTCGTTCATGCACACGTTAG	ACAGTACTTGGCGTTAAGAGGG	Macedo et al. 2012
a04	a04_06	TC9E08a	103.59	(GA)10		GAAACAGCCGCGAGAGAA	CCCTAACCTCTCTTCATTGTGC	Moretzsohn et al. 2005
a04	a04_06	seq17G6	105.19	(TTG)6	0.375	AACGACAACGACAACGACAA	TCCACTATACAGTTGGGGGC	Ferguson et al. 2004
a04	a04_06	seq3H6	105.29	(GT)16	0.2688	CGCAGGCTATAACTAGCTCCC	CATAAAGCAAATGGCGACAA	Ferguson et al. 2004
a04	a04_06	GM1135	110.39			ACCAGGAAACCCACCAGTTAG	CAACCCAAGTTTTGAACCTCA	Knapp et al. (unpublished)
a04	a04_06	PM120	114.69	(GA)6(GT)5(GA)6(GA)6		TGTGTGAATGTGGAGGATGAA	ATGGATCCAACGGTTACCAA	He et al. 2003
a04	a04_06	IPAHM108	115.79	(TC)18	0.4992	CTTGTCAAACTCTGTGACTTAGCA	CATGAACAATTACACCCAGTCA	Cuc et al. 2008
a04	a04_06	seq18C5	115.79	(TAA)23	0.4992	TTTTGCAAATGAATACACAAAATTA	GCCATGGCCTCATCTAATC	Ferguson et al. 2004
a04	a04_07	Ah594_A1	122.29	(AAC)10		TGACCAAATCATCCCATCTTGC	CAGCACATCTCCAACTTTCTCCA	Moretzsohn et al. 2005
a04	a04_07	GM1907	124.28	(TTC)7	0.504533	CACTGTCCTCTTCCCTCACTCT	GGTGGACGAAGAAGAAGAAGAA	Knapp et al. (unpublished)
a04	a04_07	GM2638	138.68	(TC)14	0.6756	ATGCTCTCAGTTCTTGCCTGA	CAGACATAACAGTCAGTTTCACC	Knapp et al. (unpublished)
a04	a04_07	GM2637	139.73	(GA)12	0.746944	ATGCTCTCAGTTCTTGCCTGA	AAGGAGCCAGCTAGCTACATAGT	Knapp et al. (unpublished)
a04	a04_08	Ah-408	142.81	(AAC)5(ACT)4		CATGGACATAGCAGCACAAACA	GAGGGTGGTGGCGTTTTAGA	Moretzsohn et al. 2005
a04	a04_08	Ah569	143.31	(TGG)4 + (GTA)4 + (TTG)5 + (AAC)4		GCGTTTTAGAGCCCCATTTGAG	CATGGACATAGCAGCACAAACAAC	Moretzsohn et al. 2005
a04	a04_08	Ah3TC39A10	144.51	(AG)12 (GA)9	0.73823	GCTGCTAATCGAGATGCAAGTA	TTTGTTTCACGCCAGTAGATTTT	Macedo et al. 2012
a04	a04_08	TC5A07	146.23	(AG)15(GA)8	0.345679	GTTTGGTTCTCCCTCCTCCT	AGCCTCTTCATTCCCCTCAT	Moretzsohn et al. 2005
a04	a04_08	GM2313	146.81	(AG)17	0.475984	GATGCTGCTAAATCGAGATGC	GTTGTTTTGTTTCACGCCAGT	Knapp et al. (unpublished)
a04	a04_08	Ah3TC13G05	146.95	(CT)21 (TC)24	0	GACACAACGTTATCGAACCAAA	CAAGAGGAGACAGGGAAGAAGA	Macedo et al. 2012
a04	a04_08	RN12E01	147.55	(TAT)7(AAC)9		TTCTTTTACAACCCACACACCA	TGGTCATGCTTTCAATCACTTC	Moretzsohn et al. 2005
a04	a04_08	IPAHM395	152.4	(GA)14	0.554688	CAGAGTCAATGGCAGCGTAG	TCCTTCCCTCATCTAAAACCAA	Cuc et al. 2008
b04	b04_01	GM1416	0	(CT)9	0.483597	TTCTTCTCTTTTCCCCAGCAC	TGGCTACTCCCTGAGACATTG	Knapp et al. (unpublished)
b04	b04_01	GM2584	18.9	(CT)12	0.423515	ACATTTTCAGCACCCTTCCTT	ACTCGTCAATGTTCCCTTGTG	Knapp et al. (unpublished)
b04	b04_01	IPAHM219	20	(TG)15	0.4992	TCTCTTTTGTGTATTTTGGGCTA	AGCCTGCGAAACTAAGGTTG	Cuc et al. 2008
b04	b04_01	TC1B04	20		0.375			Moretzsohn et al. 2005
b04	b04_02	GM1089	29.1	(GAT)5	0.525274	TTGGAACAAGGATGGAAAGAA	GTTTACGGTTGGCTTGTCAAA	Knapp et al. (unpublished)
b04	b04_02	TC11H06	37.8	(AG)34	0.672	CCATGTGAGGTATCAGTAAAGAAAGG	CCACCAACAACATTGGATGAAT	Moretzsohn et al. 2005
b04	b04_03	seq12E10	44.8	(TAA)14		TGCTTTTAGAGGCTTTGCCA	GAAACTGCAACAGCAACAGAA	Ferguson et al. 2004
b04	b04_03	seq13A10	44.8	(TAA)12	0.592593	AACTCGCTTGTACCGGCTAA	AGGAATAATAACAATACCAACAGCA	Ferguson et al. 2004
b04	b04_03	GM1445	44.8	(CAT)7	0.151629	GTTGGCAGAGTGGAAGAACTG	CGCTTTTATAATAGGCCGAGGT	Knapp et al. (unpublished)
b04	b04_03	seq4H11	45.7	(GA)26		ATCACCATCAGAACGATCCC	TTTGTAGCCTTCTGGCGAGT	Ferguson et al. 2004
b04	b04_03	S11	47.01	(CT)4TT(CT)9	0.576582	ATGACGGCAGTAGCAGAAGC	TTGAGGAGAAGACGCTGTTG	Wang et al. 2007
b04	b04_03	IPAHM121	49.86	(CT)19(CA)15	0.375	GCTATATCCAGACAGCCATCG	GAGAAGGGTGGATTGAAGAAGA	Cuc et al. 2008
b04	b04_03	seq14D11	50.63	(TAA)27		ACGCTAGTCCCTTTGCTTTG	AAACAATCCTTTCTTTGGATGG	Ferguson et al. 2004
b04	b04_04	IPAHM97	66.68	(AC)11(TC)18	0.3648	TCAGCTGTCTCTCTGCTCCA	CTCCAAGCAAAAAGTTGAAGG	Cuc et al. 2008
b04	b04_05	IPAHM451	82.08	(TG)11		AAAGAGAGGGAGCCCGTAAG	CCTGCGGGTAGGGTATATATTG	Cuc et al. 2008
b04	b04_05	gi_0832	87.28	(ATT)10	0.26	GCCACTTTATTCTAAGCACTCC	AAGAGACCACACGCTCACA	Moretzsohn et al. 2005
b04	b04_05	EM_42	90.35	(AG)6(AG)6		TTGCCTTGTTGACTGATGGG	CTCCCTCTGCTACTCACCAAAA	Liang etal, 2009
b04	b04_05	GM2033	92.24			AAGGTGAAACCAGGAAGCAAT	CCATGACACAAATCCATTGTC	Knapp et al. (unpublished)
b04	b04_05	GM2589	95.88	(TC)12	0.520721	TTTCAGCTACCCTTCTTCCAAA	CAAAAGTGAACCCCGTAAGAA	Knapp et al. (unpublished)
b04	b04_05	TC4H07	99.18	(TC)32	0.345679	CCTCCGTTGCTCTTCTGAAC	GATCAAGCACTTCAGACAATGG	Moretzsohn et al. 2005
b04	b04_05	seq17F06	99.54	(GA)35	0.743827	CGTCGGATTTATCTGCCAGT	AGTAGGGGCAAGGGTTGATG	Ferguson et al. 2004
b04	b04_05	PM35	99.54	(GA)18(GAA)2		TGTGAAACCAAATCACTTTCATTC	TGGTGAAAAGAAAGGGGAAA	He et al. unpublished
b04	b04_06	GM1959	101.34	(TC)22	0.651852	GTGTTCTCAGCCATCTTTTCG	GTGAAGGTGTTGTGAATGCAG	Knapp et al. (unpublished)
b04	b04_06	TC4E09	106.8	(TC)22	0.345679	CTTTCTTCCCCCTTGAACCT	GATCAAGTGAAAATGTTAGTATAAG	Moretzsohn et al. 2005
b04	b04_06	GM1571	108.7	(GGAGAA)6	0.239198	ACAAATGAGTTGGGTGCTTTG	TCGTCCCAAAATTACACTTCG	Knapp et al. (unpublished)
b04	b04_06	Ah3TC12A01	108.88	(TC)20	0	ATTCAACGTCGATGGTTATTGG	ACATTAGGCTCCAGCATGTGAC	Macedo et al. 2012
b04	b04_06	GM2265	110.27	(TAG)8	0.304688	GGTTCCAACATCACTGAGGAA	CTACCATCATCATCAGCAGCA	Knapp et al. (unpublished)
b04	b04_06	IPAHM105	113.5	(CT)18	0.375	CAGAGTTTGGGAATTGATGCT	GCCAGATCTGAGCAAGAACC	Cuc et al. 2008
b04	b04_06	IPAHM108	113.87	(TC)18	0.4992	CTTGTCAAACTCTGTGACTTAGCA	CATGAACAATTACACCCAGTCA	Cuc et al. 2008
b04	b04_06	GM2481	115.19	(CAA)6	0.345679	CCACCCTCACCTCTTCATCTT	TTGGTCCAAAGGGGTATGAAT	Knapp et al. (unpublished)
b04	b04_06	seq11H11	115.24	(CT)8		GCTATAAGCGGGTACTTTCTCTTT	TTCCAGTTATTGTTTTCATCACC	Moretzsohn etal. 2005
b04	b04_06	GM2482	116.05	(CAA)8	0.518609	TGTCCTTGACACTGAAGACCA	GACAAAGGAGAAGAGGCTTGC	Knapp et al. (unpublished)
b04	b04_07	Ah-408	125.49	(AAC)5(ACT)4		CATGGACATAGCAGCACAAACA	GAGGGTGGTGGCGTTTTAGA	Moretzsohn et al. 2005
b04	b04_07	seq15C12	125.5	(TAA)28	0.5632	ACAATGCAATGACCGTTGTT	TTGTTGCATGAGAACGTGAA	Ferguson et al. 2004
b04	b04_07	RN9C02	125.55	(CTT)7(TCT)5		CGTTACACTGAGCCAGCAACTC	ACGGCGGCGATAGTTTCA	Moretzsohn etal. 2005
b04	b04_07	Ah-569	127.72	(TGG)4(GTA)4(TTG)5(AAC)4		GCGTTTTAGAGCCCCATTTGAG	CATGGACATAGCAGCACAAACAAC	Moretzsohn etal. 2004
b04	b04_07	Ah3TC13G05	133.02	(CT)21 (TC)24	0	GACACAACGTTATCGAACCAAA	CAAGAGGAGACAGGGAAGAAGA	Macedo et al. 2012
b04	b04_08	seq8B09	154.62	(CTT)6		TGCCAATTGCACTCTTCATC	TGAGGTGCTCTGCATGAAAC	Ferguson et al. 2004
b04	b04_08	PMc348	157.12	(AAT)6		TGCCTGTAAGTGTGGACCAA	ACTCCAAAACGGGGAGTGTT	He et al. 2003
b04	b04_09	PMc297	170.05	(AAT)4CAT(AAT)2		ATGCACCTGCAAGTGAAGAG	TCAAGGATGCAGCAAGACAC	He et al. 2003
b04	b04_09	EM_88	173.76	(AAT)6		AGAGCAGCAGCACAACAGAG	ACCCAAGCCAAAGTTCAAGG	Liang etal, 2009
b04	b04_09	seq18C05	177.66	(TAA)23	0.4992	TTTTGCAAATGAATACACAAAATTA	GCCATGGCCTCATCTAATC	Ferguson et al. 2004
a05	a05_01	ARS715	0		0.4998	CGATCCTAGACCCGATGAAA	TCGCGAAACTATAAGACCAACA	He et al. unpublished
a05	a05_02	ARS720	37.5		0.4909	TTTGAATTTTCACCTTCGTCA	TTGCTTCTGTGATGTCCGAG	He et al. unpublished
a05	a05_03	GM1049	50.75			TTTTAATGCACGAAGCCAATC	CACACCCCGTCATAGGTTCTA	Knapp et al. (unpublished)
a05	a05_03	GM1878	54.65	(CT)22	0.476755	TCAGTGGTTCAGTGCATCAAG	GTCCCTTGGTCATCTTCGATT	Knapp et al. (unpublished)
a05	a05_04	GM654	61.2			TTGCATGTTAGTCCCACCACT	CCGCACTCGTTTGGAAATTA	Knapp et al. (unpublished)
a05	a05_04	GA34	64.14	(TC)5(TA)9		TTCAATCATTTCACGTGTCAATC	AGTGCTAGGAGCCAGCAATTT	Ma et al. 2006
a05	a05_04	IPAHM356	71.55	(GA)21G(GA)2	0.569763	TTGGGATTGGATCCCTAAGA	CAACTACCCTTCTCTCCACCA	Cuc et al. 2008
a05	a05_05	GM1577	82.1	(GA)13	0.694087	GCGGTGTTGAAGTTGAAGAAG	TAACGCATTAACCACACACCA	Knapp et al. (unpublished)
a05	a05_05	seq9A7_2	85.95	(TAA)24		TCAGCCATTCTGATTATGTAAGTTTT	TCTCAGTTTCCACGTTGAGC	Ferguson et al. 2004
a05	a05_05	TC3A12	91.73	(TC)27	0.671296	GCCCATATCAAGCTCCAAAA	TAGCCAGCGAAGGACTCAAT	Moretzsohn et al. 2005
a05	a05_05	TC2B09	93.73	(TC)27	0.345679	GCCCATATCAAGCTCCAAAA	TAGCCAGCGAAGGACTCAAT	Moretzsohn et al. 2005
a05	a05_06	ARS806	101.78		0.4867	CAGGCTTAAACTCCGTGAGC	ACTTGGATGACCCGGTACAA	He et al. unpublished
a05	a05_06	GM1955	104.62	(TCT)7	0.291783	CACACTCTGTCCCCACCATAG	TAACCGCAAGATTCCAAAGAA	Knapp et al. (unpublished)
a05	a05_06	RN6F05	105.84					Proite et al 2007
a05	a05_06	Ah6_125	114.89	(TTC)13		TCGTGTTCCCGATTGCC	GCTTTGAACATGAACATGCC	Hopkins et al. 1999
a05	a05_06	ARS702	117.25		0.5	ATGGCACATGAACAGCAAAA	TCCTCTTGCAAGCAAAATCC	He et al. unpublished
a05	a05_07	GM1007	120.81	(AAG)6	0.2688	TCGCGAATAACGAAGAAAGAA	ATTCCACTGACGTTGTTCCTG	Knapp et al. (unpublished)
a05	a05_07	GA35	123.81	(AAT)18		CAAAGTTTGCAGTGATTTTGTTG	AAATTTTCAGGTAAATCATTCTT	Budiman etal.2006
a05	a05_07	GM633	123.81			CAAAGTTTGCAGTGATTTTGTTG	AAATTTTCAGGTAAATCATTCTT	Knapp et al. (unpublished)
a05	a05_07	seq8C10	131.92	(CTG)7		ACGCCAACGACGTTAATACC	GTGCAATGGATGAGCTGAAA	Ferguson et al. 2004
a05	a05_07	seq9A7	138.75	(TAA)24		TCAGCCATTCTGATTATGTAAGTTTT	TCTCAGTTTCCACGTTGAGC	Ferguson et al. 2004
a05	a05_08	TC3G05	144.35	(GAG)4(CTT)15(TC)23		GATCCCAAGTCTCCAGAGGA	AACAACAAGGAGGCAGAGGA	Moretzsohn et al. 2005
a05	a05_08	Ah3TC22H12	144.95	(TC)23	0.65217	TTCTAGGTCTTCCTCTGCCTTG	ACGCGATTGGATAGAATAAGGA	Macedo et al. 2012
a05	a05_08	Ah3TC28A12	144.95	(AG)21	0.80903	TTGAAAGCGAGAGTTTTGAGAA	TCTCAGTTTCTTTGTCGCTCAT	Macedo et al. 2012
a05	a05_08	seq11E11	144.95	(GA)12		CTGCTATATTCTGGGCGGAG	CGAGAAAACAGTTTGGGAGG	Ferguson et al. 2004
a05	a05_08	PM179	144.95	(GA)15	0.4992	CTGATGCATGTTTAGCACACTT	TGAGTTGTGACGGCTTGTGT	He et al. 2003
a05	a05_08	PM45	144.95	(GA)16	0.375	TGAGTTGTGACGGCTTGTGT	GATGCATGTTTAGCACACTTGA	He et al. 2003
a05	a05_08	ARS754	148.35		0.4784	GAGATGCGTCAAAGGGCTTA	TCTAAATGGGTGGACAAGCG	He et al. unpublished
a05	a05_08	PM65	148.35	(CT)12(AT)4		GGACGTCTGGCTGCTAGAGA	TCGGCATCAAAACAGTGAGA	He et al. 2003
a05	a05_08	GM630	149.6			CAGCAATTCAGCAAACTAATGAA	TCCTCCCACGTCCTTTTATTT	Knapp et al. (unpublished)
a05	a05_08	seq11C08	150.68	(TTA)17	0.345679	GTGATTGGTTAGCCTGATTAAAA	TGTTTGGAAAGGAAAATGGA	Ferguson et al. 2004
a05	a05_08	TC2D08	150.8	(CT)25	0.4992	ATGTGGGGAGGTCGGTAAC	TCACAGGTTTTGTGTGCTCG	Moretzsohn et al. 2005
a05	a05_08	ARS801	151.92		0.5	CAAAGTCGCACAAAGTGGAA	AACTCCGCAGGCTGTGACTA	He et al. unpublished
a05	a05_08	seq10D4	153.32	(GA)24	0.375	ATCCCTGATTAGTGCAACGC	CGTAGGTGGTTTTAGGAGGG	Ferguson et al. 2004
a05	a05_08	seq19E9	153.32	(TAA)14	0.345679	ACTGCTTGCTCTCTTCCTCG	TTCCACCTATAAAATCAATGGTGA	Ferguson et al. 2004
a05	a05_08	Ah4-26	155.92	(CT)25		TGGAATCTATTGCTCATCGGCTCTG	CTCACCCATCATCATCGTCACATT	Hopkins et al. 1999
a05	a05_08	GA87	156.32	(CCA)6		CTTCACCTCCAAAATCAACCA	ACCGCTGACATTTGATTGTTC	Budiman etal.2006
a05	a05_08	ARS777	159.13		0.5	CAGCCCGATGAAGGAATAAA	CGACCTAAACTCCGTAGGCA	He et al. unpublished
a05	a05_09	PM36	160.26	(GA)18	0.2688	ACTCGCCATAGCCAACAAAC	CATTCCCACAACTCCCACAT	He et al. 2003
a05	a05_09	ARS760	161.91		0.4786	GCAACATAAAGTAATCAACAAGGG	CCACGTTTTGACCCAATTTT	He et al. unpublished
a05	a05_09	GM1890	162.64			CTCTCCGATTATAGGCCAACC	TGGCTTCTCCGTGAAAATAAC	Knapp et al. (unpublished)
a05	a05_09	TC6E01	164.23	(GA)22	0.62037	CTCCCTCGCTTCCTCTTTCT	ACGCATTAACCACACACCAA	Moretzsohn et al. 2005
a05	a05_09	Ah3TC19D09	165.93	(CT)20	0	AAATCCAACGATTTCGGTAAGA	CATGCATAGTGAGAATCAAGGAA	Macedo et al. 2012
a05	a05_09	Ah742	168.83	(TTG)4(TGA)5(TTG)5(ATG)6		ATGGACCAGAGATCCTCCATGC	TGGAGCCATTCACAACTCATCA	Moretzsohn et al. 2005
a05	a05_09	seq2F10	170.37	(GA)20	0.345679	GTGGTGGCGGTGTAATCTTT	AAACGCAAAACTCTCCCTCA	Moretzsohn et al. 2005
a05	a05_09	Ah614	173.88	(AAC)5(TCT)5		GCCAACTATCAACTCCCTCGCT	GAGTGAATGGCGAGAACTGGAA	Moretzsohn et al. 2005
a05	a05_09	GM637	175.13			TGACTTTAATTTTGAGCTTCCTATAA	TTTTCTGTCCATAATTATATCGTATTT	Knapp et al. (unpublished)
a05	a05_09	GM2078	176.1	(TCA)5, (AAG)5	0.1638	TCATGATGCAATGATAATAGGC	CTGGTCCATTGGGGACTCT	Knapp et al. (unpublished)
a05	a05_09	GM632	179.31			TTCAATCATTTCACGTGTCAATC	AGTGCTAGGAGCCAGCAATTT	Knapp et al. (unpublished)
a05	a05_10	RN16F05	188.72	(TGG)6	0.375	CCTACCTCCTTGCCGTCCT	CCGATTCCTCCTTCTCTTCG	Moretzsohn et al. 2005
a05	a05_10	seq10H1A	192.28	(AGA)5		TGACAATGGGGTGTTCTTCA	GTAAACAGACGCCGTTCCAT	Ferguson et al. 2004
a05	a05_10	gi-0385	192.28	(AG)8(GCAT)3		ACACAAAGCACCATATTTTACTCCT	ACTCCGAATTAAAGCGAATTGA	Moretzsohn et al. 2005
a05	a05_10	gi-0620	194.58	(TGCA)3(TC)8		CTCTCCAGTTTCGTCCTTATCT	TTAGGAGTACACAAAGCACCAT	Moretzsohn et al. 2005
a05	a05_10	GM667	195.68			ACCAAGTCAAATGTTGCCCTA	CGTTCTTCCTCTGTTCCTTCA	Knapp et al. (unpublished)
a05	a05_11	GM1988	206.48	(TTC)10	0.253261	GGAGAATCAATTGGTGGAAGC	TCAGACATAGGTGGTGGTGAA	Knapp et al. (unpublished)
a05	a05_11	GM1702	211.61	GAA		GATTGGGAAGCAGCAAGAAG	CAACCAGCTCCTTCTCTACCC	Knapp et al. (unpublished)
a05	a05_11	IPAHM167	215.93	(GA)17	0.54	CACTCCCCATCAAAACTAACAG	TTCCTCCTTCCCCAAGAGAT	Cuc et al. 2008
a05	a05_11	TC5C05	216.46	(AG)6(AG)14		TCATCTTCACTTCCCCTTTCA	CCCAACCAAATCCAACACTT	Moretzsohn et al. 2005
a05	a05_11	GM1989	219.92	(TTC)10	0.387793	GCTTGCCTGACTCATTCACTC	AATGTTCCTTTCCATCGAGGT	Knapp et al. (unpublished)
a05	a05_12	seq19D1	224.13					Ferguson et al. 2004
a05	a05_12	seq18G1	232.63	(TAA)6	0.345679	AATAGGTTGTGAAGCACGCA	TTCGGTGGTACTTTTAAGGCA	Ferguson et al. 2004
b05	b05_01	GM1539	0	GA		GCTCTTGTTAATTCGATTCCA	CAACCAGCTCCTTCTCTACCC	Knapp et al. (unpublished)
b05	b05_01	IPAHM352	4.31	(GA)9GG(GA)8	0.375	GGCGGGACACTTATCAGAGA	TTCCGTGTGACAGAAATACCC	Cuc et al. 2008
b05	b05_01	GM2769	6.42	CTT		CAAAGTCCCATGAATGCTCTC	CAACCAGCTCCTTCTCTACCC	Knapp et al. (unpublished)
b05	b05_01	GM2137	7.62	CTT		CAAAGTCCCATGAATGCTCTC	CAACCAGCTCCTTCTCTACCC	Knapp et al. (unpublished)
b05	b05_01	GM2084	8.09	(ATG/TGA/AACAAT)	0.642	CGCAGAAATGAACCGAAATTA	GGATGCATTCTTCTTCCTCCT	Knapp et al. (unpublished)
b05	b05_01	IPAHM73	9.83	(GA)13		ACTAACAGCGTAGCCGTCGT	ACCCCTCTCAGTGTTTTCCA	Cuc etal,2008
b05	b05_01	IPAHM75	12.57	(C)6(TC)18	0.2688	ATATGGCATGGGTGTTCATC	CCTAAAGCAGCATATTGCATAC	Cuc et al. 2008
b05	b05_01	IPAHM287	15.82	(TG)16(AG)22	0.501458	TCTAACCCTTCGGTTCATGG	TCACTATCCCATCCCTGCTC	Cuc et al. 2008
b05	b05_02	GM1641	22.13	(GAAA)6	0.141107	ACACGTGTCCCTCAAACACA	GTTGCAGAGCTCATCAAGCA	Knapp et al. (unpublished)
b05	b05_02	seq9G05	24.48	(GT)(GA)	0.375	CAAATTGTGCAGCCAAGAGA	CATATGCCCAGGAAGAGGAA	Ferguson et al. 2004
b05	b05_02	Ah3TC19E01	29.1	(TC)34	0.5	ATCAGAAACAGAACCCTGGAGA	GGGGAAGAAGAAAGCGGA	Macedo et al. 2012
b05	b05_02	TC6E01	33.2	(GA)22	0.62037	CTCCCTCGCTTCCTCTTTCT	ACGCATTAACCACACACCAA	Moretzsohn et al. 2005
b05	b05_02	AC2C02_B1	34.3	(GA)24		CTTCGACGGAAGATCGTATTT	GGGTGCTATAATGGCTGAACT	Moretzsohn et al. 2005
b05	b05_02	Ah3TC22F10	34.3	(TC)23	0	CTCATTTAGACATGTGGGCAGT	CTTCGACGGAAGATCGTATTT	Macedo et al. 2012
b05	b05_02	seq19D6	35.6	(TAA)19	0.375	TTTGTTATGCTCACACCCCA	AAAAATGAAGCAATATTTTGTTGTTAG	Ferguson et al. 2004
b05	b05_03	TC1D12	48.5	(TC)9	0	CCCTTTCATTCTCCCTTTCC	TTCTCCTGCACTAGGTTTCCA	Moretzsohn et al. 2005
b05	b05_03	IPAHM272	55.4	(TA)7(GT)12(TG)7	0.375	TCCACTTTGGAGAAACAGGTG	CAAACCCCTGACTCGACCT	Cuc et al. 2008
b05	b05_03	PM36	59.2	(GA)18	0.2688	ACTCGCCATAGCCAACAAAC	CATTCCCACAACTCCCACAT	He et al. 2003
b05	b05_04	IPAHM282	60.35	(CA)14(TA)5	0.37	AAGCCTTTGCGAATATAACCA	TGCAGGACTTGTATTTTGAGGA	Cuc et al. 2008
b05	b05_04	GM723b	61.6	TC		CAAACCCTAACCCAAATAAAACC	TTCACCCTTGAGTACCGGAAT	Knapp et al. (unpublished)
b05	b05_04	IPAHM455	64.39	(TA)5(TG)16		TGCAGAGACTTGTATTTTGAGG	AAGCCTTTGCGAATATAACC	Cuc etal,2008
b05	b05_04	GM1555	74.81	(AG)19	0.578649	CGTAGACGTGAACCACTACCAA	CGCCTAGTGTCTCAGAAAACG	Knapp et al. (unpublished)
b05	b05_04	seq19H3	76.12	(TAA)18		TGGCAGGCAGTAAACATCAG	TTGAGGACGTGATGAACTGG	Ferguson et al. 2004
b05	b05_05	IPAHM-354	81.96	(GA)16		TCCGAATCAAAATTGGCACT	ACCTCTCCCTCTCAAGTTTTTGT	Cuc et al. 2008
b05	b05_05	TC2B09	83.72	(TC)27	0.345679	GCCCATATCAAGCTCCAAAA	TAGCCAGCGAAGGACTCAAT	Moretzsohn et al. 2005
b05	b05_05	TC11B04	92.81	(GA)20	0.592593	GATCTGAAGGCTCTGATACCAT	GATCTCAACCAGAACAGTATGC	Moretzsohn et al. 2005
b05	b05_05	PMc348	99.04	(AAT)6		TGCCTGTAAGTGTGGACCAA	ACTCCAAAACGGGGAGTGTT	He et al. 2003
b05	b05_06	PM50	103.31	(GA)19	0.345679	CAATTCATGATAGTATTTTATTGGACA	CTTTCTCCTCCCCAATTTGA	He et al. 2003
b05	b05_06	Ah3TC19D09	112.51	(CT)20	0	AAATCCAACGATTTCGGTAAGA	CATGCATAGTGAGAATCAAGGAA	Macedo et al. 2012
b05	b05_06	PM418	113.03	(CT)23	0.579758	TCTAATGAAAACCGACAAGTTTAGA	AGGCGTGCCAATAGAGTTTT	He et al. 2003
b05	b05_06	PM183	116.68	(CT)24	0.375	TTCTAATGAAAACCGACAAGTTT	CGTGCCAATAGAGTTTTATACGG	He et al. 2003
b05	b05_08	GM657	145.48			ACTTTGGTGGCTTTCCTTCAT	TCTCTGTGCCCTCTTTCTTCA	Knapp et al. (unpublished)
b05	b05_09	IPAHM136	167.28	(TC)2(CT)13	0.375	CCCCTTTCTCCACTACTACCA	TTCTCCTAGGGACTCCGATG	Cuc et al. 2008
a06	a06_01	IPAHM171c	0	(TC)7(TC)9	0.375	TTGGTTGTTCGTAGCTCTGC	AGCACGGCAAACACTAACACT	Cuc et al. 2008
a06	a06_01	IPAHM171	3.9	(TC)7(TC)9	0.375	TTGGTTGTTCGTAGCTCTGC	AGCACGGCAAACACTAACACT	Cuc et al. 2008
a06	a06_01	PM377	6.79	(GA)21	0.345679	ACGCTCACATGTTTGCTTTG	GCTCGATTTGATTTGGGTGA	He et al. 2003
a06	a06_01	seq9H8a	9.35	(TAA)20	0.2688	CTGGATACATCGACGCTGAG	GCGGTCCAATACTAACAAAATC	Ferguson et al. 2004
a06	a06_01	S108	16.65	(TC)14(AC)15	0.621817	GCTTACATTACACGTCATCTC	CCGAACTTACAGTTAGGAG	Wang et al. 2007
a06	a06_02	GM1097	38.6	(GAT)6	0.51994	CGTTTGGCAATACCTGTGTTT	CCTCTTCCTCATCATCATCATC	Knapp et al. (unpublished)
a06	a06_03	AC2H11	43.09	(CT)18(CA)17		TCCTTTACTTGTGCAGTTGTGC	AAAACGCCATGTGGTGGAT	Moretzsohn et al. 2005
a06	a06_03	TC3H07a	45.84	(GA)20(TTC)4	0.345679	CAATGGGAGGCAAATCAAGT	GCCAAATGGTTCCTTCTCAA	Moretzsohn et al. 2005
a06	a06_03	IPAHM659	48.74	(GA)18		AAGTCACTGGCCAAAACTGC	CCCTCGATTTCGACTCAGAC	Cuc et al. 2008
a06	a06_03	RN31A05	49.34	(CAA)5		CAGACCCATTTGTGAGTTGTGT	ATCATTCATCGAAGGTCCAAAG	Proite et al 2007
a06	a06_03	seq4H06	49.34	(GA)18		CCAACATTGCAGAAGCAAGA	CAAAGAGAGGCACACCACAA	Moretzsohn et al. 2005
a06	a06_03	RN21H01	49.94	(GCT)5(CTC)4		GCTTCCACAAGAGCGAGAGAG	GGCACCACTCCAATGTAATCAG	Moretzsohn et al. 2005
a06	a06_03	seq15D3	49.94	(GA)11		CATGCCATCATCACAACACA	GGAGGAAGCAATGGTTTCAG	Ferguson et al. 2004
a06	a06_04	TC3H07c	66.44	(GA)20(TTC)4	0.345679	CAATGGGAGGCAAATCAAGT	GCCAAATGGTTCCTTCTCAA	Moretzsohn et al. 2005
a06	a06_04	TC3H07b	71.04	(GA)20(TTC)4	0.345679	CAATGGGAGGCAAATCAAGT	GCCAAATGGTTCCTTCTCAA	Moretzsohn et al. 2005
a06	a06_04	seq18G9_A1	77.92	(TAA)20	0.345679	ATATCAGCGCCAATGACTCC	TCGCTCCTGGCACCTATATC	Ferguson et al. 2004
a06	a06_05	Ah3TC28E09	80.02	(TC)21	0.28733	CTCCGTCAACCTAGACCATCTT	CCGAAGAACAACACAAAACAAA	Macedo et al. 2012
a06	a06_05	PM5	80.22	(GA)20(GAA)2(CTTTTCTCTTT)2	0	TGTGAAACCAGATCACTTTCATT	TGATAGTTGATATTGAGGAAAATGG	He et al. 2003
a06	a06_05	GM1489	83.7	AT		GGAAGATGTGGTTGCAAATTC	CAACCAGCTCCTTCTCTACCC	Knapp et al. (unpublished)
a06	a06_05	GM1490	84.4	ATGT		AAACTCAAGGGCCAGCATATC	CAACCAGCTCCTTCTCTACCC	Knapp et al. (unpublished)
a06	a06_05	Ah20	86.03	(TGG)6(GTG)6		GGTGTTGTTTCCTGCTTTCTTGG	TACTTCTTCCACCAGCACCACC	Moretzsohn et al. 2005
a06	a06_05	seq18A8_A1	87.83	(TAA)9		TCAATTTCAAAATATTTCCACTTTCTT	GGGTTAGCATATGACCCCAA	Ferguson et al. 2004
a06	a06_05	TC9C06	88.83	(AG)18(AG)49		CAAATGGCAGAGTGCGTCTA	CCCTCCTGACTGGGTCCT	Moretzsohn et al. 2005
a06	a06_05	TC1A01	89.61	(TC)25	0.345679	TCAACGCGACACAAGAAGTC	GTCGGTAAATCCGACGAAAA	Moretzsohn et al. 2005
a06	a06_05	Ah3TC38A07	94.66	(AG)21	0.56625	CAAAGCAAAAGATTTCACTGAG	AGTGCTCTTTCTGCATATGTTT	Macedo et al. 2012
a06	a06_06	GM2337	102.13	AG		TGTGGAAATGAAGGGACATTG	CAACCAGCTCCTTCTCTACCC	Knapp et al. (unpublished)
a06	a06_06	TC11A04-1	112.06	(CT)16(CT)33	0.3648	ACTCTGCATGGATGGCTACAG	CATGTTCGGTTTCAAGTCTCAA	Moretzsohn et al. 2005
a06	a06_07	ARS816	128.53			TCAGCGGCTACGATGAATAA	TGGGTATCCACAACCACAAA	He et al. unpublished
a06	a06_07	ARS774	128.63			GCCTGTAGCACTGCAAACAA	GGAATAGGGGCAAGAATGGT	He et al. unpublished
a06	a06_07	ARS793	129.23			TCACAAAATGCTTGGAATGC	GAACTGAGCACAAACTCAGTAACAA	He et al. unpublished
a06	a06_07	TC1A02	131.33	(TC)35	0.345679	GCAATTTGCACATTATCCGA	CATGTTCGGTTTCAAGTCTCAA	Moretzsohn et al. 2005
a06	a06_07	GM623	134.23			CAGGATGAACAGGCACAGAAT	ATGAACAATTGCGATTTGGAC	Knapp et al. (unpublished)
a06	a06_07	RN34H10	134.53	(TA)11	0.345679	CCACCTCAAAAGCGAAGATTGT	GGATATAAATATAGCTAGGAGCCTGTG	Moretzsohn et al. 2005
a06	a06_08	IPAHM245	140.63	(GT)13	0.5632	CCCAAGGACCTAGTGACCAA	GGACCCTTAGCACATTCCAA	Cuc et al. 2008
a06	a06_08	GA21	143.8	(TAT)16		CAGGATGAACAGGCACAGAAT	ATGAACAATTGCGATTTGGAC	Ma et al. 2006
a06	a06_08	seq4E12	146.4	(GA/GT)20		TTTTCTTAACACCCTACCCCC	CCAGCTCATGCAAACAAACA	Ferguson et al. 2004
a06	a06_08	TC11A04	148.59	(CT)16(CT)33	0.3648	ACTCTGCATGGATGGCTACAG	CATGTTCGGTTTCAAGTCTCAA	Moretzsohn et al. 2005
a06	a06_09	IPAHM509	163.69	(CA)25	0.554688	GCCTGCAAAGCTAAGGTTG	TGGAGAGTTAGGATTTCTGGCTA	Cuc et al. 2008
a06	a06_09	TC7C06	167.29	(GA)23	0.671296	GGCAGGGGAATAAAACTACTAACT	TTTTCCTTCCTTCTCCTTTGTC	Moretzsohn et al. 2005
a06	a06_09	EM-90	172.09	(TGC)8		CACCAAATCTCCCACTTCCC	CGGCTATCAAATGGTGCTTC	Liang etal, 2009
a06	a06_10	Ah3TC19B03	194.01	(AG)27	0	ACCTGGCTGGATCAACACTCTA	AGAAGAGAAGTGACGGAAGCAG	Macedo et al. 2012
a06	a06_10	ARS762	198.16			CCTTTAACTTCCATGGGCCT	AACAAGCAAAATCACACGCA	He et al. unpublished
a06	a06_11	Ah4-101	207.89		0.345679	GCACCATCGCCACAAGATTAAC	GCACAGGAAAGAGCGCATTAGA	Hopkins et al. 1999
a06	a06_11	PM35	211.15	(GA)18(GAA)2		TGTGAAACCAAATCACTTTCATTC	TGGTGAAAAGAAAGGGGAAA	He et al. unpublished
a06	a06_11	GM2536	215.9	(TC)22	0.141107	AGCCTCCACCTTCTCCTATTG	GATGCAGTGGAGGGATAACAA	Knapp et al. (unpublished)
a06	a06_12	seq18G1	222	(TAA)6	0.345679	AATAGGTTGTGAAGCACGCA	TTCGGTGGTACTTTTAAGGCA	Ferguson et al. 2004
a06	a06_12	gi-0623	222.5	(CT)12		GGGGAGGATTACATAGTAGAGTTTG	CACAGATCCATATACTTTAACATAGCA	Moretzsohn et al. 2005
a06	a06_12	gi-0936	222.5	(TAC)4(GA)9		TCACAGATCCATAGACTTTAACATAGC	CCGGTGTGGATTCATAGTAGAG	Moretzsohn et al. 2005
a06	a06_12	seq19H3_A2	228.4	(TAA)18		TGGCAGGCAGTAAACATCAG	TTGAGGACGTGATGAACTGG	Ferguson et al. 2004
a06	a06_12	GM1573	230.8	(TC)24	0.141107	GAGACCGGAGACGGAGAGTAT	ACGCCCATAGATTAACCCAGT	Knapp et al. (unpublished)
a06	a06_13	ARS758	247.08		0.4925	GAAGCTTTCCATGCACCAGT	TGAATCCAACAACCACAGGA	He et al. unpublished
a06	a06_13	GM2444	254.28	(CAA)10	0.601937	CCCTGTTACACACAAGCCATT	TGAGCAAGTGTTAGCCATGAA	Knapp et al. (unpublished)
a06	a06_13	GM2767	255.68	GAA		ATGACAAGGCTCTTTCGATCC	CAACCAGCTCCTTCTCTACCC	Knapp et al. (unpublished)
a06	a06_13	seq19F4	259.48	(GA)16		CCCATGATAAATTTGTATATCAAGCA	TCAACCACAGAAGACGACGA	Ferguson et al. 2004
a06	a06_14	IPAHM689	260.19	(GA)20	0.703125	GATGACAATAGCGACGAGCA	GTAAGCCTGCAGCAACAACA	Cuc et al. 2008
a06	a06_14	GM1916	260.59	AGA		ATCGACAAGAATTGGGGTGA	CAACCAGCTCCTTCTCTACCC	Knapp et al. (unpublished)
a06	a06_14	PM210	275.79	(CT)25		CCGCAGATCTTCTCCTGTGT	CCTCCTCATCCTCTAAACTCTGC	He et al. 2003
b06	b06_01	GM2513	0	(TC)16	0.479052	GCATAGGCAATACCGCATATCT	CCCAATGTGTGATCAATTACGA	Knapp et al. (unpublished)
b06	b06_01	TC4D09	3.95	(CT)18	0.345679	TTGTGCTCTGCTCTTGGTTG	CTTGCTGGAGGAAACACACA	Moretzsohn et al. 2005
b06	b06_01	seq18G01	5.36	(TAA)6	0.345679	AATAGGTTGTGAAGCACGCA	TTCGGTGGTACTTTTAAGGCA	Ferguson et al. 2004
b06	b06_02	TC3H07	24.56	(GA)20(TTC)4	0.345679	CAATGGGAGGCAAATCAAGT	GCCAAATGGTTCCTTCTCAA	Moretzsohn et al. 2005
b06	b06_02	seq19E07	33.79	(TATG/AT)11		TAGCCGACCTAAACTTTGCG	GGAGATTCTTATGAATTGTGCG	Ferguson et al. 2004
b06	b06_03	IPAHM524	41.49	(GA)20AA(GA)3	0.699708	GCCATGGATAAGAACCTGAAA	CAGTAAGCTGAGCTGGCAGA	Cuc et al. 2008
b06	b06_03	TC1A02	42.22	(TC)35	0.345679	GCAATTTGCACATTATCCGA	CATGTTCGGTTTCAAGTCTCAA	Moretzsohn et al. 2005
b06	b06_03	TC11A04	45.91	(CT)16(CT)33	0.3648	ACTCTGCATGGATGGCTACAG	CATGTTCGGTTTCAAGTCTCAA	Moretzsohn et al. 2005
b06	b06_03	PM210	49.71	(CT)25		CCGCAGATCTTCTCCTGTGT	CCTCCTCATCCTCTAAACTCTGC	He et al. 2003
b06	b06_03	seq19A05	51.41	(TAA)12	0.4992	ATTCGTCTCCTTCTTTTGGC	TTTTGCTTCCAAATGGCTTC	Ferguson et al. 2004
b06	b06_03	IPAHM165	51.41	(GA)13	0.345679	CAACACGTTCGCTTCCAGAT	TCACTCTCATTTCCGCCATT	Cuc et al. 2008
b06	b06_03	GM670	53.31			AGAGTCTCGTGCTAATAACGTGT	TGGATAACCCATTTTCTATGTTG	Knapp et al. (unpublished)
b06	b06_03	PM137	55.41	(GA)20	0.375	AACCAATTCAACAAACCCAGT	GAAGATGGATGAAAACGGATG	He et al. 2003
b06	b06_03	Ah3TC24B05	57.03	(TC)30	0.885	ATTGATACCTCTTTGCTCTCGC	TGAAACCCTAACTAGCTCGGAA	Macedo et al. 2012
b06	b06_03	Ah3TC19F05	58.13	(TC)20	0	TAAATTGTGCTTGGACTTCCCT	TTCCAGTTTATCTCGATCACCA	Macedo et al. 2012
b06	b06_04	seq3C02	62.8	(GA)9		TCATCGCCGAGATTCTTTTC	CAAGGGAAATTGGTCAAGGA	Ferguson et al. 2004
b06	b06_04	GM1991	63.3	(TC)12	0.707556	GAAAATGATGCCGAGAAATGT	GGGGAGAGATGCAGAAAGAGA	Knapp et al. (unpublished)
b06	b06_04	GA2	63.3	(CAC)5(CAA)6		GTGTCCTGTGGTGTCCAAATTA	TGCATACCGGAGAAATTCAAG	Budiman etal.2006
b06	b06_04	GM884	70.3	(TTC)5	0.151629	GCCGCAATTAACACTGGAATA	TTCCGCTTCCTCTTCTTCTTC	Knapp et al. (unpublished)
b06	b06_04	AC2C02_B2	74.96	(GA)24		CTTCGACGGAAGATCGTATTT	GGGTGCTATAATGGCTGAACT	Moretzsohn et al. 2005
b06	b06_04	GM2444	78.31	(CAA)10	0.601937	CCCTGTTACACACAAGCCATT	TGAGCAAGTGTTAGCCATGAA	Knapp et al. (unpublished)
b06	b06_04	GM2425	79.99	(GA)17	0.375	TAACCAACACAAGCCCACAA	TCCATCATCACCCTCATCAA	Knapp et al. (unpublished)
b06	b06_05	PM671	83.59	(GGC)12	0	GAGGGAGCACAAATGAGGAA	CCTCACCAACCCTCATTCTC
b06	b06_05	IPAHM407c	99.03	(GA)17	0.375	TAACCAACACAAGCCCACAA	TCCATCATCACCCTCATCAA	Cuc et al. 2008
a07	a07_01	GM1979	0	(GA)17	0.372925	TCCAAGAGGAAGAGGGAAAAC	AAAACCCTTACTTCAACAAAAGA	Knapp et al. (unpublished)
a07	a07_02	GM1919	28.8	(AG)14	0.291783	TGGAAGGGGTCAGAAGAAGTT	CCGTGTCTCTCTCTTTCTCTCC	Knapp et al. (unpublished)
a07	a07_02	IPAHM108	38.7	(TC)18	0.4992	CTTGTCAAACTCTGTGACTTAGCA	CATGAACAATTACACCCAGTCA	Cuc et al. 2008
a07	a07_02	seq18C5	38.7	(TAA)23	0.4992	TTTTGCAAATGAATACACAAAATTA	GCCATGGCCTCATCTAATC	Ferguson et al. 2004
a07	a07_04	S118	64.5	(AAT)6	0.64265	TATATGATGCTTGATTGAGACT	CATGTAGAAGGCTTGGAGGGTAT	Wang et al. 2007
a07	a07_05	RN34A10	87.87	(AT)6	0.345679	CCCATTTTGGACCCCTCAAATA	GAGCAATAGTGACCTTGAATTGTTG	Proite et al. 2007
a07	a07_05	RN13D04	91.89	(CTT)5 + (TC)9		CCGAGGTAGAATCGCAAGC	GTAATGCCAGGGAGAATCAGC	Moretzsohn et al. 2005
a07	a07_05	RN32H04	92.08	(AAG)6	0.4992	CCACCCAACAACAAAGACAAAGA	ATGTTTTAAGGAACAGAGCGGA	Moretzsohn et al. 2005
a07	a07_05	seq2E6	93.87	(GA)12	0.345679	TACAGCATTGCCTTCTGGTG	CCTGGGCTGGGGTATTATTT	Ferguson et al. 2004
a07	a07_05	ARS734	98.07		0.4897	TTGCTAATCACATTGTTGGTTT	TACCTGGCCCAGAAAAGAAA	He et al. unpublished
a07	a07_05	seq5D5	98.37	(GA)32	0.672	AAAAGAAAGACCTTCCCCGA	GCAGGTAATCTGCCGTGATT	Ferguson et al. 2004
a07	a07_05	Ah3TC23E04	99.47	(GA)24	0.71875	TGGGTATCAAACAAAACAAGAGG	TCAAAGACAAACACCAAAACCTT	Macedo et al. 2012
a07	a07_06	Ah3TC22D09	100.07	(GA)19	0.31163	CCCATGAAACAGAACAAGACAA	GTCACCTGCAACCAGAACAAC	Macedo et al. 2012
a07	a07_06	PM42_A1	100.57	(GA)3GAAA(GA)14		ACGGGCCAAGTGAAGTGAT	TCTTGCTTCTTTGGTGATTAGC	He et al. 2003
a07	a07_06	GM1494	105.47	(TTC)16	0.4662	CTTCGAAGAAAAGTGCATCG	GAAGACAGAAGACGAAGAGCGTA	Knapp et al. (unpublished)
a07	a07_06	seq15B4-2	109.31	(AT)24		AAGCTCTAGACTCGGCCTGC	AACCAGGATTTTTGGTGTGC	Ferguson et al. 2004
a07	a07_06	Ah32	109.86	(GA)19		CTTTGTCTTCCATGGCTGCT	TCTTAATGAGGCACGCTACC	Moretzsohn et al. 2009(BB)
a07	a07_06	Ah594_A2	110.84	(AAC)10		TGACCAAATCATCCCATCTTGC	CAGCACATCTCCAACTTTCTCCA	Moretzsohn et al. 2005
a07	a07_06	GM1937	111.26	(TC)12	0.599438	TTCATCCTCTGCTTCCTTTGA	TGACCAAACCCATCATCATCT	Knapp et al. (unpublished)
a07	a07_06	seq14D1	111.92	(TAA)12		TCGATTGGTTACGGCTAAAAA	GCTAAATACTCAAATGAAATTCAAAA	Ferguson et al. 2004
a07	a07_06	GM1076	114.98	(GAA)6	0.501096	AACAGACCAAAGGGTGTGTGA	TGCAGATTCTCACTTCCTAAGC	Knapp et al. (unpublished)
a07	a07_06	IPAHM290	115.88	(TA)3(CA)3(CA)5(TA)8	0.304688	CCACCGCTGATGTGTAATTGTA	GACGTGTAGTTGAAAACAACAGTATCA	Cuc et al. 2008
a07	a07_06	seq3B8	117.58	(TAA)21	0.375	GGAGAAAGATCAAACGAGAACA	TTCGAATATCTGACATTTGCTTTT	Ferguson et al. 2004
a07	a07_07	PM85	131.08		0.592593			He et al. 2003
a07	a07_07	Ad90K4	134.35	(AT)23		TTTTCGGTCAAAACAAATCACA	TTATTGCACTTGGCATTTTGAG	Bertioli et al. (unpublished
a07	a07_07	seq16G4	136.05	(GA)12		CAAAAAGCTACGTGCCAAAAC	CAAACGGAAACCTCCCTTAT	Ferguson et al. 2004
a07	a07_08	TC9C08	142.85	(GA)22		ACTTTTGGGGCAGGATGAG	GCCTCTATTGCTGAGATTATTGC	Moretzsohn etal. 2005
a07	a07_08	TC9H08	142.85	(AG)21	0.345679	GCCAAAGGGGACCATAAAC	TCCATCTTCCATCTCATCCAC	Moretzsohn et al. 2005
a07	a07_08	GM2050	144.25	(CCA)6, (GTG)5	0.363329	CATGATCAAGAGAAGTTGAATCG	TTCTTGTTTGAATTGCCCTAA	Knapp et al. (unpublished)
a07	a07_08	GM1880	145.82			CCAAAATGGAGGGTCCTTAGT	CAACCAGCTCCTTCTCTACCC	Knapp et al. (unpublished)
a07	a07_08	TC4G10	147.62	(GA)20(GA)5(GT)5	0.345679	TTCGGTCATGTTTGTCCAGA	CTCGAGTGCTCACCCTTCAT	Moretzsohn et al. 2005
a07	a07_08	GM1986	154.52	(TA)14	0.781274	GCTGCTGCAAGTCTTAAGGAA	AAAGTGTCAGGTGCAAAGCAT	Knapp et al. (unpublished)
a07	a07_08	ARS753	155.92		0.5	TTTTATAGAGCGAAATCACAAGTAAA	TTCGGAACAAAGGTTATGGG	He et al. unpublished
a07	a07_08	seq3A1	158.92	(TAA)22		ATCATTGTGCTGAGGGAAGG	CACCATTTTTCTTTTTCACCG	Ferguson et al. 2004
a07	a07_09	PM204	166.52	(GA)20	0.304688	TGGGCCTAAACCCAACCTAT	CCACAAACAGTGCAGCAATC	He et al. 2003
a07	a07_09	GM1922	167.42	GA		GGAGAGTCGGTGAGAGGAGAG	CAACCAGCTCCTTCTCTACCC	Knapp et al. (unpublished)
a07	a07_09	GM1990	169.52	(TATC)8	0.39294	TCCTTCCCACAATAACAATGAA	GAGGAGAAAACATGGCCTAAAA	Knapp et al. (unpublished)
a07	a07_09	Ah3TC38F01	170.44	(GA)27	0.71441	TTTATGCATCACTTCAAGCAGG	AGCTGTTGAGCTTGCATCCTAT	Macedo et al. 2012
a07	a07_09	seq2A6	175.14	(TAA)14		GCTTCTTCGTTGTTGCCTTC	TGCCAGTTGTTCATAGCTTCA	Ferguson et al. 2004
a07	a07_09	RM2D04	178.04	(GA)13		CCATCACGAGCTGCTGTAAACAC	TTAACTCCCTCCGTTATCCGTT	Proite et al. 2007
a07	a07_09	TC6G09	178.34	(CT)18		GGAGGTTGCATGCATCATAGT	TCATTGAACGTATTTGAAAGCTC	Moretzsohn et al. 2005
a07	a07_10	ML4D02	183.06	(TA)6	0.375	GGGTCAAGTCATTTTCTATGCT	GCCATCACACATCATCCAT	Moretzsohn et al. 2005
a07	a07_10	ARS724	188.96		0.5	TGAAGCCATCCACAGTTTGT	GCTCAGACAGGAGCACATGA	He et al. unpublished
b07	b07_01	RN13D04	0	(CTT)5 + (TC)9		CCGAGGTAGAATCGCAAGC	GTAATGCCAGGGAGAATCAGC	Moretzsohn et al. 2005
b07	b07_01	GM1953	8.63	(AGA)11	0.304688	TCCACAGTCGAGAGTCCAG	GCCGTCCCAAACATTTTATTC	Knapp et al. (unpublished)
b07	b07_01	seq2E06	18.43	(GA)12	0.345679	TACAGCATTGCCTTCTGGTG	CCTGGGCTGGGGTATTATTT	Ferguson et al. 2004
b07	b07_01	GM2156	18.43	(TTC)13	0.141107	CGTGTCCTTGTTCTCTTCTCTG	TGGAGGAATGAAGGAAGGAAT	Knapp et al. (unpublished)
b07	b07_02	Ah3TC41A11_1	20.18	(GA)31	0	CGATTGGATAGAATAAGGGACG	GGTCCAAACTACCTAAGATGCG	Macedo et al. 2012
b07	b07_02	GM2073	24.78	AAG/AAGTAG		GAGATTGTTGATCGGATTGGA	CAACCAGCTCCTTCTCTACCC	Knapp et al. (unpublished)
b07	b07_02	GM2067	24.78	(TCA)7, (AGA)9	0.3648	TCGCCAAGAAGAACAAAACAC	CTGGTCGAAGAAGGGTTCTCT	Knapp et al. (unpublished)
b07	b07_02	seq5D05	25.48	(GA)32	0.672	AAAAGAAAGACCTTCCCCGA	GCAGGTAATCTGCCGTGATT	Ferguson et al. 2004
b07	b07_02	GM1899	26.41	(TC)15	0.475984	GGCTCCGATTTCTACGTTTCT	GGAGCTCCGATGAGAAGCTAA	Knapp et al. (unpublished)
b07	b07_02	PM69	29.08					He et al. 2003
b07	b07_02	GM2745	29.4	(TA)12	0.363329	TCAAATGATGGAAGCTAAGCAA	GCGAAGAAGCTTTCACAACAA	Knapp et al. (unpublished)
b07	b07_02	GM2744	32.21	(GAC)8	0.363329	TCAAATGATGGAAGCTAAGCAA	AACAACTCATCAATGGCGAAG	Knapp et al. (unpublished)
b07	b07_02	GM1254	37.21	AAT		CCAAGGACTACATTTACCACTGC	CAACCAGCTCCTTCTCTACCC	Knapp et al. (unpublished)
b07	b07_02	GM2605	37.67	(CT)8	0.781829	ACTGCTGCCATGGTTGAGTTA	TTTCGCACTTTCTCAGTTTCC	Knapp et al. (unpublished)
b07	b07_03	GM1076	40.57	(GAA)6	0.501096	AACAGACCAAAGGGTGTGTGA	TGCAGATTCTCACTTCCTAAGC	Knapp et al. (unpublished)
b07	b07_03	GA24	41.87	(TAT)22		AACGAAATATTTTGAGAAAGGAT	AGCATTAGCAACTCTAAGCTCAT	Ma et al. 2006
b07	b07_03	GM1000	49.47	(ATG)6	0.141107	CAGCCCCTTTCTTTTAATCCA	CATTATGAGGGAAGCCAGACA	Knapp et al. (unpublished)
b07	b07_03	seq15C10	49.49	(TAA)16	0.345679	ATTCCCATGTCGTCAAGACC	GCGACGGTATTGGCTTTTAG	Ferguson et al. 2004
b07	b07_03	TC4G10	52.2	(GA)20(GA)5(GT)5	0.345679	TTCGGTCATGTTTGTCCAGA	CTCGAGTGCTCACCCTTCAT	Moretzsohn et al. 2005
b07	b07_03	TC9H09	52.85	(AG)23	0.345679	TTAGCGACAAAGGATGGTGAG	TAGGGACGAAAATAGGGACTGA	Moretzsohn et al. 2005
b07	b07_03	seq19C03	58.45	(GT)17		TCATCGCCAAACTCTTCTCC	TCGAAGAGTGCATGTTGACC	Ferguson et al. 2004
b07	b07_04	seq19B12	64.16	(TAA)19	0.375	CGTCCTTGTCAAGCTGTATTG	CCAATGTGCAACAAAACAAGA	Ferguson et al. 2004
b07	b07_04	GM624	68.26			AACGAAATATTTTGAGAAAGGAT	AGCATTAGCAACTCTAAGCTCAT	Knapp et al. (unpublished)
b07	b07_04	seq14D11	68.26	(TAA)27		ACGCTAGTCCCTTTGCTTTG	AAACAATCCTTTCTTTGGATGG	Ferguson et al. 2004
b07	b07_04	EM_30	72.56	(CT)7		ATGAACCAGGACGAAAAGAG	GGGGGGAGATTAGAGAAGAG	Liang etal, 2009
b07	b07_04	seq3C02	74.33	(GA)9		TCATCGCCGAGATTCTTTTC	CAAGGGAAATTGGTCAAGGA	Ferguson et al. 2004
b07	b07_05	ARS795	80.32		0.4671	CATTGCAGTTTCCCAGGAGT	TAGCACTCAGTCGGTCTCCA	He et al. unpublished
b07	b07_05	TC3B05	85.36	(AG)25	0.5632	GGAGAAAACGCATTGGAACT	TTTGTCCCGTTGGGAATAGT	Moretzsohn et al. 2005
b07	b07_05	RM7E04	87.56	(GA)12		CCAATTGAATGGAGTGCAATTTT	TTGGCATAAAGATGCGATCTAA	Proite et al. 2007
b07	b07_05	TC2G05	94.06	(GA)35	0.375	GCCGAGCTAGTTTGATTTGG	TTGGATTTGAATGGAGGAATG	Moretzsohn et al. 2005
b07	b07_06	TC7A02	100.12	(CT)6(GA)19	0.345679	CGAAAACGACACTATGAAACTGC	CCTTGGCTTACACGACTTCCT	Moretzsohn et al. 2005
b07	b07_06	TC3B04	101.42	(TC)23		GAAGAAGAAGTCACTGCGGC	AAGCTAGTTTCTGATTAAAGCACCA	Moretzsohn et al. 2005
b07	b07_06	Ah3TC40C03_B2	106.87	(GA)26	0	TTGTTTGCTTTGTAAAATAGGTTGAC	AAATAATCTCAGCCAAGGCGTA	Macedo et al. 2012
b07	b07_06	TC11F12	114.37	(AG)22	0.535494	TGAGTCTGTGGAAGAATAAGAGAAG	TGAGTCTATCGCCGCCTAC	Moretzsohn et al. 2005
a08	a08_01	TC9B08	0	(GA)22	0.324865	GGTTGGGTTGAGAACAAGG	ACCCTCACCACTAACTCCATTA	Moretzsohn et al. 2005
a08	a08_01	GM2788	3.8	TCTGGT		AAGTTTCATTTCCAGGGCATT	CAACCAGCTCCTTCTCTACCC	Knapp et al. (unpublished)
a08	a08_01	RM7E04	10.9	(GA)12		CCAATTGAATGGAGTGCAATTTT	TTGGCATAAAGATGCGATCTAA	Proite et al. 2007
a08	a08_01	TC3B05	10.9	(AG)25	0.5632	GGAGAAAACGCATTGGAACT	TTTGTCCCGTTGGGAATAGT	Moretzsohn et al. 2005
a08	a08_02	GM2289	29.1	(TCT)5	0.309175	GAAGTGCCTCATTCACCGTTA	ATCCTTCTTCTTCCGATCCAA	Knapp et al. (unpublished)
a08	a08_02	ARS795	32.2		0.4671	CATTGCAGTTTCCCAGGAGT	TAGCACTCAGTCGGTCTCCA	He et al. unpublished
a08	a08_02	TC7A02	38.4	(CT)6(GA)19	0.345679	CGAAAACGACACTATGAAACTGC	CCTTGGCTTACACGACTTCCT	Moretzsohn et al. 2005
a08	a08_03	RN22A12	42	(CAG)6(CAA)5		CACGAGAAGCAGAGGAAGAAGA	GCAGCAACAACTCAGGGAAGT	Moretzsohn et al. 2005
a08	a08_03	TC1E07	43.78					Moretzsohn et al. 2005
a08	a08_03	GM1901	46.56	(AT)12	0.423515	GAAACACCGATATTTTCGATACA	TGACGAGCAAGTCATGTATGTG	Knapp et al. (unpublished)
a08	a08_03	GM1538	48.44	GAA		AGCTCCAGAGGCAAAGAAAAC	CAACCAGCTCCTTCTCTACCC	Knapp et al. (unpublished)
a08	a08_03	gi-716	49.53	(AT)6		AGTAGACCAAATTAAACCACACT	TAGATGATTGTGAATGTTTCTG	Moretzsohn et al. 2005
a08	a08_03	TC1E05	56.23	(GA)30		GAAGGATAAGCAATCGTCCA	GGATGGGATTGAACATTTGG	Moretzsohn et al. 2005
a08	a08_03	ARS800	59.29		0.4971	CCGTAAGCTTTTTATAACACACACA	GCAAAAACCTTTTAGCATACCA	He et al. unpublished
a08	a08_03	Ah3TC23H09	59.46	(TC)17 (CT)14 (TC)20	0	GGAACCAGCTTCACTTTCATCT	TATTCTAATTCCGGTTTCCCTG	Macedo et al. 2012
a08	a08_04	GM1357	60.89	TTC		ACGCAATGCACATCCTTTAGA	CAACCAGCTCCTTCTCTACCC	Knapp et al. (unpublished)
a08	a08_04	RM5G08	66.72	(AG)6		ATAGTCCATGATAGCCCCATGT	TTACAACCGAATCTGCAAAGAC	Proite et al. 2007
a08	a08_04	GM1760	67.42	(TTC)18	0.576582	TGAAGAGCCATGTCAGATCG	AGGGCCCCAACAAGATAAGT	Knapp et al. (unpublished)
a08	a08_04	seq2A5	67.92	(TAA)19		GGGAATAGCGAGATACATGTCAG	CAGGAGAGAAGGATTGTGCC	Ferguson et al. 2004
a08	a08_04	RN18H05	70.37	(GA)8		AATCAAGCTCCAAGATTTCG	CTCAATGCAGAGATCCATGATA	Moretzsohn et al. 2005
a08	a08_04	Ah3TC21D06_1	71.97	(CT)12	0.13265	ATCCTTACCCCAAAGCAACG	TGGTGATGGAGTTGAATGAATG	Macedo et al. 2012
a08	a08_04	RM2C01	77.59	(AAC)7		CGGTCAAGGCTACCCCTTCTACT	ATCCAATCCATCCAAGAAAGTG	Proite etal. 2007
a08	a08_04	TC6H03	79.58	(AG)21	0.375	TCACAATCAGAGCTCCAACAA	CAGGTTCACCAGGAACGAGT	Moretzsohn et al. 2005
a08	a08_05	Ad90F2	81.93	(TAT)25		CTCAATGGCCGGTATGATTAGT	TTGAGATAACGCTTCCGAAAAT	Bertioli et al. (unpublished)
a08	a08_05	TC9F10	81.93	(AG)31	0.2688	ATCACAATCACAGCTCCAACAA	GGCAAGTCTAATCTCCTTTCCA	Moretzsohn et al. 2005
a08	a08_05	Ah3TC22C01	84.43	(CT)21	0	AGACCCTCAACTTCCAGAACTC	CAATGAAGGGCAAACATTATCA	Macedo et al. 2012
a08	a08_05	seq5D1	88.42	(AT/GA)10		TGGCCAAAACAACTGATTGA	TCCCAACTTTTCCGTTCTTG	Ferguson et al. 2004
a08	a08_05	TC9H08	91.79	(AG)21	0.345679	GCCAAAGGGGACCATAAAC	TCCATCTTCCATCTCATCCAC	Moretzsohn et al. 2005
a08	a08_05	IPAHM229	93.11	(CA)14(CA)3	0.5632	TCAGCCTGCGAAACTAAGGT	TGGAGAACTAGGATCTCTTTTGTG	Cuc et al. 2008
a08	a08_05	IPAHM540	93.71	(TA)4(TG)12		TGGAGAACTAGGATCTCTTTTGTG	CCTAACTCAGCCTGCGAAAC	Cuc et al. 2008
a08	a08_05	ML1G04	95.78	(TA)6		GAAGGACTGAAGACTACTTT	ATCCAGTAGATTACGTTACA	Moretzsohn et al. 2005
a08	a08_05	seq2G3	99.38	(TAA)8		ATTCACAAGGGGACAGTTGC	ATTCAAGCCTGGGAAACAGA	Ferguson et al. 2004
a08	a08_06	seq3A8	100.08	(TAA)20		ATACGTGACTTGGGCCAGAC	AGTGAAAAATACACCCAACGAA	Ferguson et al. 2004
a08	a08_06	GM1628	102.08	(AT)7	0.141107	AAACGTGCTCTAGAAACATACAAAA	CAACACATGCAATGCAACAA	Knapp et al. (unpublished)
a08	a08_06	GM2754	109.2	CAT		TGCCAATGCTCTTCAATAGGT	CAACCAGCTCCTTCTCTACCC	Knapp et al. (unpublished)
a08	a08_06	TC3B04	113.23	(TC)23		GAAGAAGAAGTCACTGCGGC	AAGCTAGTTTCTGATTAAAGCACCA	Moretzsohn et al. 2005
a08	a08_06	TC9F04	115.02	(TC)23	0.324865	CCTAAACAACGACAAACACTCA	AAGCACAACACAGAACCCTAAA	Moretzsohn et al. 2005
a08	a08_07	TC11F12	131.95	(AG)22	0.535494	TGAGTCTGTGGAAGAATAAGAGAAG	TGAGTCTATCGCCGCCTAC	Moretzsohn et al. 2005
a08	a08_08	GM2407	143.93	(GA)14	0.525274	GCTGAGTCAGAAGTAAACGAGGA	ATCGGACGGAGAGAGAGTGAG	Knapp et al. (unpublished)
a08	a08_09	TC1B02	179.53	(CT)25	0.743827	AACATGCATGCAAATGGAAA	GCCAAAGTCACTTGTTTGCTT	Moretzsohn et al. 2005
a08	a08_12	GM1863	223.53	(TC)12	0.723721	CACACCCAGTCACTCTCTCTG	TCTGATGTTCTGTGTGTGGAGA	Knapp et al. (unpublished)
a08	a08_14	GM2089	267.23	(TCC/TCT)	0.39294	ATCGCGCAGTTAAAGAAGTGA	ATCTGAGTTCCGAGCAGTTCA	Knapp et al. (unpublished)
b08	b08_01	TC3G01b	0	(TC)14(TC)12	0.345679	GACGGTAATCGTGCCCTAAA	TGCAGTAGTGGCAGCAGAAC	Moretzsohn et al. 2005
b08	b08_01	IPAHM373	17.9	(TTG)6CT(GTT)8		CAAGATCTTTCGTACATTCATTCAC	CACGCTCTTAGCAATTTCTGG	Cuc et al. 2008
b08	b08_02	GM1760	23.1	(TTC)18	0.576582	TGAAGAGCCATGTCAGATCG	AGGGCCCCAACAAGATAAGT	Knapp et al. (unpublished)
b08	b08_02	Ah51	30.91	(AG)34		CCTCTTCACAAGAGTGGACTATGA	CCCCCTCCTTTTGTTCTCTC	Gimenes et al.(2007)
b08	b08_03	ARS738	40.4		0.5	CTTGCTGTGGTGGATTTCCT	GCCTCCAATTTGCGAATCTA	He et al. unpublished
b08	b08_03	PM733a	45.66	(CCG)11	0.375	CCAAATCTTCTCATCAAGTTGC	GAGAGGGAGCACAAATGAGG	He et al. 2003
b08	b08_03	AC2C12	46.66	(TA)6(TG)20(GT)6		TATCGAGCCGAATATGAAT	GCAGGATTTTGTAATTGAGAG	Moretzsohn et al. 2005
b08	b08_03	TC6H03	47.96	(AG)21	0.375	TCACAATCAGAGCTCCAACAA	CAGGTTCACCAGGAACGAGT	Moretzsohn et al. 2005
b08	b08_03	TC9F10	53.81	(AG)31	0.2688	ATCACAATCACAGCTCCAACAA	GGCAAGTCTAATCTCCTTTCCA	Moretzsohn et al. 2005
b08	b08_03	IPAHM406	54.16	(GA)9(GA)8(GT)5	0.55	TGAAAGGGATTGGACCAAAA	TGTTGGACAGGATTTCACACA	Cuc et al. 2008
b08	b08_03	Ah3TC20B05	54.36	(GA)28 (TA)7	0.70862	GCATGTAAACTATGCAATCGCT	CAACAACTTATTCCACCAAATATCA	Macedo et al. 2012
b08	b08_03	Ad90F2	55.03	(TAT)25		CTCAATGGCCGGTATGATTAGT	TTGAGATAACGCTTCCGAAAAT	Bertioli et al. (unpublished)
b08	b08_03	ARS789	55.75		0.5	TGCTAAATAAAAGGTAATTAGTGGCA	AACACTGAAACTTTGAGAGCACA	He et al. unpublished
b08	b08_03	Ah4-101	57.67		0.345679	GCACCATCGCCACAAGATTAAC	GCACAGGAAAGAGCGCATTAGA	Hopkins et al. 1999
b08	b08_03	GM1961	57.67	(AG)16	0.426876	TGTATTCTCCCTGAAATGACGA	CTTCTTCCTCCATCCTCCCTA	Knapp et al. (unpublished)
b08	b08_03	GM679	57.67			GGTGTTATGTATAGCCACCAG	AAATAGTATGGACCAGAAATAATAAG	Knapp et al. (unpublished)
b08	b08_03	GM660	58.27			TGAAAGTAACTCGTTTACAGTTTGAAG	TCACTAAACATGTGGGTAACTAAGAAA	Knapp et al. (unpublished)
b08	b08_03	PM721	58.27	(GGC)10	0.2688	GAGGGAGCACAAATGAGGAA	TACGGTGCATATGCCAAAGA	He et al. 2003
b08	b08_04	IPAHM123	62.57	(GA)18	0.2688	CGGAGACAGAACACAAACCA	TACCCTGAGCCTCTCTCTCG	Cuc et al. 2008
b08	b08_04	Ah1	69.97	(TC)10		TAGGACAGTTCCTCCTAAC	GGATACCATAATAGAGTTGG	Hopkins et al. 1999
b08	b08_04	GM2690	70.87	AGA/TTG		GACGCCGTGGTTTATGACTT	CAACCAGCTCCTTCTCTACCC	Knapp et al. (unpublished)
b08	b08_04	GM2689	71.27	GAA		GACGCCGTGGTTTATGACTT	CAACCAGCTCCTTCTCTACCC	Knapp et al. (unpublished)
b08	b08_04	IPAHM229	71.56	(CA)14(CA)3	0.5632	TCAGCCTGCGAAACTAAGGT	TGGAGAACTAGGATCTCTTTTGTG	Cuc et al. 2008
b08	b08_05	GM2746	80.86	(TTC)10	0.504064	TCAACCTCAAGGGTGATTGTC	ACACAAACCCGCTCACTCTAA	Knapp et al. (unpublished)
b08	b08_05	GM2504	80.86	(AT)18	0.74087	ACATCAATCCCTGCCTACCTC	TCGGATTCTGTTACCACCTCA	Knapp et al. (unpublished)
b08	b08_05	PM419	96.46	(GA)10	0.375	TGCGAGACCAGAGAGGAGAT	TAGCGGTTCAGAAACCCTTT	He et al. 2003
b08	b08_06	IPAHM606	102.16	(CA)15TA(CA)3 (TA)4	0.592593	CCTAACTCAGCCTGCGAAAC	CAGAGGTGTTTGGAGAACTAGGA	Cuc et al. 2008
b08	b08_06	IPAHM219	103.66	(TG)15	0.4992	TCTCTTTTGTGTATTTTGGGCTA	AGCCTGCGAAACTAAGGTTG	Cuc et al. 2008
b08	b08_06	seq2A06	103.66	(TAA)14		GCTTCTTCGTTGTTGCCTTC	TGCCAGTTGTTCATAGCTTCA	Ferguson et al. 2004
b08	b08_06	IPAHM540	104.26	(TA)4(TG)12		TGGAGAACTAGGATCTCTTTTGTG	CCTAACTCAGCCTGCGAAAC	Cuc et al. 2008
b08	b08_06	IPAHM177	105.16	(CA)11(CA)3(TA)4	0.5632	TCAGCGGAGAAGAAAACTAAGG	GAGGTGTTTGGAGAACTAGGATTT	Cuc et al. 2008
b08	b08_06	Ai123M2	106.86	(TA)23		GCAAGAGGGATAGGAGTTTTGA	TTCCTCAGGCTCTACAAGAAGG	Bertioli et al. (unpublished)
b08	b08_06	Ah3TC40E08	106.9	(GA)22	0.08318	TAGCAACAATAAATCGCAATGG	TTGCTCATCATTTCGTGATTTC	Macedo et al. 2012
b08	b08_06	Ah3TC24E01	108.34	(TG)9 (GA)18	0.07986	AAAATCTACACCATCCAGCTCC	CCTTGCAACCTAGCACTGATAA	Macedo et al. 2012
b08	b08_06	GM1986	108.92	(TA)14	0.781274	GCTGCTGCAAGTCTTAAGGAA	AAAGTGTCAGGTGCAAAGCAT	Knapp et al. (unpublished)
b08	b08_06	Ah3TC38C01	109.51	(TC)20	0	GACAGGTGGAGAGGGTATTCAG	GCTTGTTCATGTTCCTGCATTA	Macedo et al. 2012
b08	b08_06	IPAHM407	109.51	(GA)17	0.375	TAACCAACACAAGCCCACAA	TCCATCATCACCCTCATCAA	Cuc et al. 2008
b08	b08_06	IPAHM171	110.19	(TC)7(TC)9	0.375	TTGGTTGTTCGTAGCTCTGC	AGCACGGCAAACACTAACACT	Cuc et al. 2008
b08	b08_06	Ah3TC31E08	113.29	(CT)23 (CA)7 (CA)12	0	AGACGAAGAGGAAGACGACAAC	TGGGTGAGAACAAAAGTCATTG	Macedo et al. 2012
b08	b08_06	ARS786	115.36		0.47	GCTGCACACGTCACCTTCTA	TGTTGCGATATGATGGAGGA	He et al. unpublished
b08	b08_06	AC3C07	115.96	(AC)14(AT)8		GGGGGTTTAGGAGCAAGATTT	CAAGGTGAGAACAAAGGCAAAG	Moretzsohn et al. 2005
b08	b08_06	PM188	117.16	(GA)8		GGGCTTCACTGCTTTTGATT	TGCGACTTCTGAGAGGACAA	He et al. 2003
b08	b08_07	GM2536	120.93	(TC)22	0.141107	AGCCTCCACCTTCTCCTATTG	GATGCAGTGGAGGGATAACAA	Knapp et al. (unpublished)
b08	b08_07	GM1798	120.93	TTG		GCCACATGGGAGTTTCAGTT	CAACCAGCTCCTTCTCTACCC	Knapp et al. (unpublished)
b08	b08_07	seq3A06	121.77	(GA)35	0.345679	TGCATCAGCAAGCTACATACG	GCGATTCACCATCAATCTCA	Ferguson et al. 2004
b08	b08_07	seq8H01	128.09	(TCA)6	0.345679	TTGTGACAACCTTCCCCTTC	CATCCGCTTTCTCTCACCAT	Ferguson et al. 2004
b08	b08_08	GM698	144.34			CTCCTTAACAATAAATCGAGTGATGA	CAACCCATTTGCCACCTCTAT	Knapp et al. (unpublished)
a09	a09_01	GM1878	0	(CT)22	0.476755	TCAGTGGTTCAGTGCATCAAG	GTCCCTTGGTCATCTTCGATT	Knapp et al. (unpublished)
a09	a09_01	seq8D9	2.18	(CTT)13	0.592593	TGAGTTTCCCCAAAAGGAGA	CAACAACAATACGGCCAACA	Ferguson et al. 2004
a09	a09_01	PM346	2.28	(GGC)5	0.375	AAAGGCGCACTCGATTCTAA	CGCACAGAAACATCAAGCAT	He et al. 2003
a09	a09_01	gi-1107	3.49	(AAC)4 + (CA)5 + (AT)18	0.345679	GATACATCTCATCCGTTCGTG	CCGTCCGACCACATACAA	Moretzsohn et al. 2005
a09	a09_01	RN35H04	13.39	(TA)9		CCACCCAACAACAAAGACAAAGA	ATGTTTTAAGGAACAGAGCGGA	Proite et al. 2007
a09	a09_01	PM170	13.89	(CT)9 (ATTT)7		GCCCAATGATGGACAGACA	TCAGACTTCTTGCACCATCC	He et al. 2003
a09	a09_02	RN25B01	21.09	(TCTT)6		CTCGTTTCGCATATTCGTCTTC	GAAGAAGCTGGGGTATGAGATG	Proite et al. 2007
a09	a09_02	ahFAD2A	22.92			GATTACTGATTATTGACTT	CCAACCCAAACCTTTCAGAG	Chu et al 2007b
a09	a09_02	AC3C07	29.02	(AC)14(AT)8		GGGGGTTTAGGAGCAAGATTT	CAAGGTGAGAACAAAGGCAAAG	Moretzsohn et al. 2005
a09	a09_02	GM2450	37.72	AGA		AGCAGCAGCAAGAAGATGAAC	CAACCAGCTCCTTCTCTACCC	Knapp et al. (unpublished)
a09	a09_02	TC5D06	37.72	(AG)21	0.345679	GAAATTTTAGTTTTCAGCACAGCA	TTTTCCCCTCTTAAATTTTCTCG	Moretzsohn et al. 2005
a09	a09_03	GM849	40.62	TTC		CGCCAAAAGAAGAAGAGAAGC	CAACCAGCTCCTTCTCTACCC	Knapp et al. (unpublished)
a09	a09_03	seq4G2	40.66	(GA)9		TCAACTTTGGCTGCTTCCTT	TCAACCGTTTTTCACTTCCA	Ferguson et al. 2004
a09	a09_03	ARS768	46.68		0.4908	CACTGGAGCGTCGACTGTTA	GCATGCTAGCTAAGAATACTACCAAA	He et al. unpublished
a09	a09_03	seq9B4	48.56	(TTG/TAA)7		CATTGTTAATGCACCTTTGGAA	GGCAGATTTGGTTATTGCCT	Ferguson et al. 2004
a09	a09_03	seq16G8	50.25	(TAA)18	0.345679	CTCAAAAAGCGCTTAGCCAC	CTGCCTACTGCCTACTGCCT	Ferguson et al. 2004
a09	a09_03	ARS786	51.39		0.47	GCTGCACACGTCACCTTCTA	TGTTGCGATATGATGGAGGA	He et al. unpublished
a09	a09_03	GM2359	54.49	ATCGTC	0.309175	AAATCCCCAATTCAAACCACT	CAACCAGCTCCTTCTCTACCC	Knapp et al. (unpublished)
a09	a09_03	Ah3TC25B04	54.58	(CT)22	0.7025	TGCTTGTGTATTGAGCTGTCCT	CATCTGCCAAGGTCCTAAAATC	Macedo et al. 2012
a09	a09_03	ARS766	55.39		0.4852	AACTGGTTAGACCGGGTTCA	TGTCACCCCTCACTCTCATCT	He et al. unpublished
a09	a09_03	ARS752	56.59		0.4959	TGAATACAAGCTATTTGGTGCAT	GGAGTGAGTGAAGAATTGTTGAAA	He et al. unpublished
a09	a09_03	GM1291	56.59	TC	0.2688	TCCTTGCTATTTTCCCCAAAT	CAACCAGCTCCTTCTCTACCC	Knapp et al. (unpublished)
a09	a09_03	ARS757	56.99		0.4872	TTCACGTATTGTCCAAGGCA	TGGTCTGAGGGTAGGGTGAG	He et al. unpublished
a09	a09_03	ARS759	56.99		0.4816	TCTGTGCTTTACCTTTCAGTTG	TCGAAGAGAACATGCTCAACA	He et al. unpublished
a09	a09_03	GM2792	57.89	CT		ACTTCAACCTCCCATGTCCTATT	CAACCAGCTCCTTCTCTACCC	Knapp et al. (unpublished)
a09	a09_04	GM1911	60.19	(AG)25	0.692033	CAGCTTTCTTTCAATTCATCCA	CACTTCGTGTTCTTCCTGCTC	Knapp et al. (unpublished)
a09	a09_04	ARS730	60.59		0.5	GTTCACGTCCTTGGTCTGGT	TTGAATCTTCAAGAATTGGGG	He et al. unpublished
a09	a09_04	ARS751	60.73		0.4837	CTCTCCTCTCCTCTTGCAGC	GAAATGAAAAACCGTGCGTT	He et al. unpublished
a09	a09_04	EM-87	62.37	(ATA)13		CATGCTCCTCCAATTTATTACG	CGAGACTTGAGTGCCTTGTTG	Liang etal, 2009
a09	a09_04	seq17E3	63.07	(CTT)15	0.2688	TTTCCTTTCAACCCTTCGTG	AATGAGACCAGCCAAAATGC	Ferguson et al. 2004
a09	a09_04	TC1D02	69.5	(TC)30	0.672	GATCCAAAATCTCGCCTTGA	GCTGCTCTGCACAACAAGAA	Moretzsohn et al. 2005
a09	a09_04	GM2553	71.79	CT		TCCCTTCAGTTCCGTTGAATA	CAACCAGCTCCTTCTCTACCC	Knapp et al. (unpublished)
a09	a09_04	ARS742	75.91		0.468	GATTTAATGGGGGATGAGGG	TCACCCACACCCTTTTGATT	He et al. unpublished
a09	a09_05	TC9B07	80.13	(GA)9(AG)6(AG)5	0.501458	CCATCTCCTTCTTGACTTTAGCC	GTTCTCCAACCTCCTCCTTTTC	Moretzsohn et al. 2005
a09	a09_05	GM1047	81.36	(ATA)5	0.240056	CCCCAAACTCCAATTCCTAGA	TCCAAAGGGTCAAATTTCTCA	Knapp et al. (unpublished)
a09	a09_05	PM675	82.86	(CAT)24	0.345679	AATACCCTTCCCCAATCACC	TGCTTCTGCTCGATGTTCTG	He et al. 2003
a09	a09_05	TC4A02	82.86	(GA)26	0.4992	ATTCAAATCGGAATGGCAAG	GAGCAAAGGGCGAATCTATG	Moretzsohn et al. 2005
a09	a09_05	IPAHM23	83.86	(CA)17(TA)3		GTGTCTTTTCGTTCGCGATT	CGACTCTTAGGGTGGATTATAGTAAGA	Cuc etal,2008
a09	a09_05	IPAHM82	85.66	(GA)15	0.375	CCATATCATAGCCGCCAAGT	TACATCCACGATGCAGAAGG	Cuc et al. 2008
a09	a09_05	PM15_A2	86.23	(GAAA)3(GA)8(GA)9		CCTTTTCTAACACATTCACACATGA	GGCTCCCTTCGATGATGAC	He et al. 2003
a09	a09_05	IPAHM75	88.34	(C)6(TC)18	0.2688	ATATGGCATGGGTGTTCATC	CCTAAAGCAGCATATTGCATAC	Cuc et al. 2008
a09	a09_05	Ad90P7	91.03	(TA)18		AACATAAACCATAAGACAATGGATG	TTGTTTACTTTTCCTGCCATTC	Bertioli et al. (unpublished)
a09	a09_05	GM2584	95.52	(CT)12	0.423515	ACATTTTCAGCACCCTTCCTT	ACTCGTCAATGTTCCCTTGTG	Knapp et al. (unpublished)
a09	a09_06	PM733b	101.57	(CCG)11	0.375	CCAAATCTTCTCATCAAGTTGC	GAGAGGGAGCACAAATGAGG	He et al. 2003
a09	a09_06	IPAHM372	103.73	(GA)9		GCCTTTTGAAATTCCCTTCC	TATGCCTCTTCCCCTTCCTT	Cuc et al. 2008
a09	a09_06	IPAHM468	104.23	(GA)15		GGCTTTTGAAGTTCCCTTCC	TATGCCTCTTCCCCTTCCTT	Cuc et al. 2008
a09	a09_07	GM1009	125.67	CTC		TTTCCTTCTTTCCCTTCTTCTTC	CAACCAGCTCCTTCTCTACCC	Knapp et al. (unpublished)
a09	a09_07	TC3B05	133.27	(AG)25	0.5632	GGAGAAAACGCATTGGAACT	TTTGTCCCGTTGGGAATAGT	Moretzsohn et al. 2005
a09	a09_08	seq2C11	147.02	(TAA/CAC)17	0.375	TGACCTCAATTTTGGGGAAG	GCCACTATTCATCGCGGTA	Ferguson et al. 2004
a09	a09_10	GM2259	188.32	(ATT)6	0.406519	GGAAGCACCGATAGTTCCTCT	TTCTGCTGCTTTCACTCATCA	Knapp et al. (unpublished)
a09	a09_11	seq18G1	203.17	(TAA)6	0.345679	AATAGGTTGTGAAGCACGCA	TTCGGTGGTACTTTTAAGGCA	Ferguson et al. 2004
a09	a09_12	seq19B1	220.22	(GA)15	0.2688	TTGGTGATGGTGTTGGAGAA	TTAAACCAGGCCAAAAGTGG	Ferguson et al. 2004
a09	a09_12	GM2407	234.92	(GA)14	0.525274	GCTGAGTCAGAAGTAAACGAGGA	ATCGGACGGAGAGAGAGTGAG	Knapp et al. (unpublished)
a09	a09_13	TC3E02	251.62	(CT)26(CA)7(CA)5	0.324865	TGAAAGATAGGTTTCGGTGGA	CAAACCGAAGGAGGAACTTG	Moretzsohn et al. 2005
a09	a09_13	TC3B02	256.02		0.2688			Moretzsohn et al. 2005
a09	a09_14	GM1609	267.42	CT		TGAATTCCATTTCCATCATCAA	CAACCAGCTCCTTCTCTACCC	Knapp et al. (unpublished)
b09	b09_01	GM1483	0	(TCA)13	0.600494	GCTGTTACATGGGCATCATTT	TCATCAGAGACCCAAGATCCA	Knapp et al. (unpublished)
b09	b09_01	GM1979	14.7	(GA)17	0.372925	TCCAAGAGGAAGAGGGAAAAC	AAAACCCTTACTTCAACAAAAGA	Knapp et al. (unpublished)
b09	b09_01	seq2B9	17.59	(TAA)19		GCAACATGCTCTGAATTTTGAC	TGTGCAACCCAATTCAATAACTT	Ferguson et al. 2004
b09	b09_02	TC2D08	22.34	(CT)25	0.4992	ATGTGGGGAGGTCGGTAAC	TCACAGGTTTTGTGTGCTCG	Moretzsohn et al. 2005
b09	b09_02	Ai119C17	29.98	(AT)19		AAATGTGGAGTCAGTCTCTCCG	CAAGGCAGGACTTTTGGATTAC	Bertioli et al. (unpublished)
b09	b09_02	GM1603	31.98	(ATTT)6	0.363329	GGTTATGACATCTTGATTGGATG	AGATTGCAGCGAGAAGGAAGT	Knapp et al. (unpublished)
b09	b09_02	TC5A06	34.08	(TC)27	0.345679	TCGGTTTGGGAGACACTCTT	TTGTAAGCAGACGCCACATC	Moretzsohn et al. 2005
b09	b09_02	TC1D02	35.19	(TC)30	0.672	GATCCAAAATCTCGCCTTGA	GCTGCTCTGCACAACAAGAA	Moretzsohn et al. 2005
b09	b09_03	seq14H6	41.79	(GT)31	0.592593	GCAACTAGGGTGTATGCCGT	CAACCCTATACACCGAGGGA	Ferguson et al. 2004
b09	b09_03	GM694	43.49			ATTTGTGCCCTACCACCTTCT	TCCCTCCTAGAGGTTGACTTGA	Knapp et al. (unpublished)
b09	b09_03	PM436	46.89	(GA)19	0.345679	ACACTGCTGGTGGGATTTTC	ATGAAATGAGCAAGCGGAAC	He et al. 2003
b09	b09_03	Lec1	49.54	(AT)18	0.345679	CAAGCATCAACAACAACGA	GTCCGACCACATACAAGAGTT	Hopkins et al. 1999
b09	b09_03	gi-1107	50.64	(AAC)4 + (CA)5 + (AT)18	0.345679	GATACATCTCATCCGTTCGTG	CCGTCCGACCACATACAA	Moretzsohn et al. 2005
b09	b09_04	seq7G2	62.59	(TATC)12	0.375	ACTCCCGATGCACTTGAAAT	AACCTCTGTGCACTGTCCCT	Ferguson et al. 2004
b09	b09_04	GM2120	73.06	(CA/ATC/CT)	0.3318	TCCACTGCCACCTCTATCATC	TCCACCCACATAGACAGAAGC	Knapp et al. (unpublished)
b09	b09_04	seq4G2	78.82	(GA)9		TCAACTTTGGCTGCTTCCTT	TCAACCGTTTTTCACTTCCA	Ferguson et al. 2004
b09	b09_04	Ah3TC25G11	79.32	(CT)20	0.75614	GCATCAGCTCCCATCAGTATCT	AATTGTTTGCAAGTATCATGCG	Macedo et al. 2012
b09	b09_05	ahFAD2B	82.82			CAGAACCATTAGCTTTG	CTCTGACTATGCATCAG	Chu et al 2007b
b09	b09_05	GM1893	90.06	(CTGCAC)5	0.385493	ACCTTCACCTTCACCTGCAC	CTGCCTGCCCATAGATATCAG	Knapp et al. (unpublished)
b09	b09_06	seq17C9	103.06	(TAA)9	0.375	TTTGCTTTTGTTACTGACACCAA	TGGGGGACAAAAACGATACT	Ferguson et al. 2004
b09	b09_07	GM2584	125.86	(CT)12	0.423515	ACATTTTCAGCACCCTTCCTT	ACTCGTCAATGTTCCCTTGTG	Knapp et al. (unpublished)
a10	a10_01	GM2531	0	(AAC)5	0.513185	CAAGGATGTCCCAGATGATGT	GGACTCAATTTGTCGACCCTA	Knapp et al. (unpublished)
a10	a10_01	GM1788	2.58	AG		GTTCCTACCGTGATCCCTGA	CAACCAGCTCCTTCTCTACCC	Knapp et al. (unpublished)
a10	a10_01	seq3E10	3.28	(TAA)14	0.369846	TCCCAAAAATAACAAACATGGA	ACGCTTTGAGACTCGTCGTT	Ferguson et al. 2004
a10	a10_02	TC11B04	32.78	(GA)20	0.592593	GATCTGAAGGCTCTGATACCAT	GATCTCAACCAGAACAGTATGC	Moretzsohn et al. 2005
a10	a10_03	GM647	56.88			ATCGTCCTCGCAGGTTCTTA	CTTGATTTGGTAATGGGCTGA	Knapp et al. (unpublished)
a10	a10_03	GM2411	57.61	CCA		GAAACTAATCGCGTGATGGAA	CAACCAGCTCCTTCTCTACCC	Knapp et al. (unpublished)
a10	a10_04	TC1G04	63.05	(TTC)5(TC)33	0	TGCTGTGAGAGAAATGGCAG	GCGCATTCTTCGATTAAAGG	Moretzsohn et al. 2005
a10	a10_04	TC7H11	67.15	(AG)18	0.641399	AGGTTGGAACTATGGCTGATTG	CCAGTTTAGCATGTGTGGTTCA	Moretzsohn et al. 2005
a10	a10_04	seq4H11	72.95	(GA)26		ATCACCATCAGAACGATCCC	TTTGTAGCCTTCTGGCGAGT	Ferguson et al. 2004
a10	a10_04	seq4H11_A1	73.47	(GA)26		ATCACCATCAGAACGATCCC	TTTGTAGCCTTCTGGCGAGT	Ferguson et al. 2004
a10	a10_04	AC1G11	76.37	(TA)5(TG)27		CCTTTTTCTTTCAAGGCTCCTA	TTCGTAAATCAGAGGTGGTGAG	Moretzsohn et al. 2005
a10	a10_04	AC3C02_B1	76.37	(AGA)7		TCTAACGCACACAAATCGAA	CTTGTACCTGCGCCATTCT	Moretzsohn et al. 2005
a10	a10_04	Ah3TC23D04	76.37	(CT)7 (TC)30 (TG)7 (CT)37	0.7741	TGTTCTCGTTCAGTACCTCCCT	GTAGCAAGCGTTAAGGACCTGT	Macedo et al. 2012
a10	a10_04	Ah3TC23F04_A1	76.37	(GA)20	0.23819	CACGTGTAATAGTTGCTCAAAAT	TATATGCATCAGACTCTCCAGC	Macedo et al. 2012
a10	a10_04	seq12F7	76.37	(TAA)13		TGTCGTTGTAAGACCTCGGA	TTGGTTTCCTTAAGGCTTCG	Ferguson et al. 2004
a10	a10_04	seq14F5	76.37	(TAA)9		TGAACCACTTTTTCGAAATTTTTAT	GGGTCCTCTTGTCTTGTCCA	Ferguson et al. 2004
a10	a10_04	AC2B03	76.37	(CT)9(CA)21		CTCGCTATACTAGGTTTTGGGTGT	TGGTTTGCCTTTCTAGCCATTA	Moretzsohn et al. 2005
a10	a10_04	seq11D4	76.37	(AT)27		CCCTTTTTCAAACAACCCAA	GGATTTTGCATTTGTAGTTGATAGC	Ferguson et al. 2004
a10	a10_04	seq9F1	77.07	(AT)34		GCCTAGTGTGCAAAGGTGCT	CACCTGATGTGTAGTGAGGCA	Ferguson et al. 2004
a10	a10_04	seq11F12	77.38	(AT)21		CACAGCCTTTGTGTTGCTGT	AACACACACAACACTCCACCA	Ferguson et al. 2004
a10	a10_04	GA161	77.88	(GA)35		TGAGGCCGTCTTGTTTAGAGA	CCTCTTCCATCACCGTTCATA	Ma et al. 2006
a10	a10_04	GA57	78.08	(AT)29		ATCGTCCTCGCAGGTTCTTA	CTTGATTTGGTAATGGGCTGA	Ma et al. 2006
a10	a10_04	seq18C2	78.08	(AT)19		TGAGTTCAACACTCACTTTTGTCA	GGGTACGAATTTGCCTACGA	Ferguson et al. 2004
a10	a10_04	GA79	78.18	(AGAA)9		CGCAATGAGAAATTCAACAGC	TGATAATTCTTCCGCGATTGT	Ma et al. 2006
a10	a10_04	GM633	78.62			CAAAGTTTGCAGTGATTTTGTTG	AAATTTTCAGGTAAATCATTCTT	Knapp et al. (unpublished)
a10	a10_04	PM145	78.73	(CT)12(CA)2(CT)4(CA)9		GCTGTAATTAGGATCATTCCACA	CAACGGTTGGATCGATGA	He et al. 2003
a10	a10_05	TC7H11-2	82.25	(AG)18	0.641399	AGGTTGGAACTATGGCTGATTG	CCAGTTTAGCATGTGTGGTTCA	Moretzsohn et al. 2005
a10	a10_05	IPAHM75	84.1	(C)6(TC)18	0.2688	ATATGGCATGGGTGTTCATC	CCTAAAGCAGCATATTGCATAC	Cuc et al. 2008
a10	a10_05	GA131	84.57	(GT)7(GA)10(GT)7		ATGTCCTTGCCTTGTTTCGTT	TAGTTGGCGGTATGGCTTAGA	Budiman etal.2006
a10	a10_05	AC3F07	85.07	(TG)46		TATCCTGCTTCAGCTCCCATT	CGGCCCAGCATTCTAAAGTA	Moretzsohn et al. 2005
a10	a10_05	ARS710	89.56		0.5	GTGTGGATTTGGATATCGGG	GTCGTTGTCATTGTCGTCGT	He et al. unpublished
a10	a10_05	IPAHM352	94.66	(GA)9GG(GA)8	0.375	GGCGGGACACTTATCAGAGA	TTCCGTGTGACAGAAATACCC	Cuc et al. 2008
a10	a10_05	ARS773	97.06		0.496	GGGAACGAATGAAGTAGGCA	GCATGGGTTTCAAGGTCTGT	He et al. unpublished
a10	a10_05	ARS785	97.06		0.474	GAATTCCTGGCTCGAACTTG	ACCCCTCCATTTCGTCTTCT	He et al. unpublished
a10	a10_05	ARS798	97.06		0.4865	ACGTTCAGATAAACCGGCAC	GCTGGGTGAAGAAACAAAGC	He et al. unpublished
a10	a10_05	PMc468	97.5	(AT)33		TCAAGCCATAATATGTTCCACA	AAAACAACCCAAGCACCTCT	He et al. 2003
a10	a10_05	ARS812	97.68		0.489	TTTTCTTATGGCTTCGGTGG	AAAACTATTTTGAAAGGCAAAATTAAG	He et al. unpublished
a10	a10_06	GM2605	103.13	(CT)8	0.781829	ACTGCTGCCATGGTTGAGTTA	TTTCGCACTTTCTCAGTTTCC	Knapp et al. (unpublished)
a10	a10_06	ARS775	104.05		0.5	TTCCTAGAGTGTTTTGGCTTACTG	AAAAACCTAATTATTCGACTTAAAGCA	He et al. unpublished
a10	a10_06	TC4G10	105.86	(GA)20(GA)5(GT)5	0.345679	TTCGGTCATGTTTGTCCAGA	CTCGAGTGCTCACCCTTCAT	Moretzsohn et al. 2005
a10	a10_06	RM11H01	117.5	(AG)7		TGAAGTAGAAATGGAGGAGGGA	CCTCTTAACAAAACCAACTCGC	Proite et al. (2008)
a10	a10_07	GM692	130.41			TGAGGCCGTCTTGTTTAGAGA	CCTCTTCCATCACCGTTCATA	Knapp et al. (unpublished)
a10	a10_07	GM699	132.41			CATACCGACAGATTTTGAACTCG	GTTACTGTTGCTGCCACCATT	Knapp et al. (unpublished)
a10	a10_08	GM799	144.81	(CT)8	0.345679	AAAAGCTATTCAAACGCACTTT	GCAGCAGAATGAGGAAGAAAA	Knapp et al. (unpublished)
a10	a10_09	GM2307	172.86	(GGC)5	0.318011	CCATGCAGGAAAGCAAGATAA	GCTGGTACATTCGGAGAGTGA	Knapp et al. (unpublished)
a10	a10_10	GM2669	180.76	(CTT)5	0.123855	CTAACCCTGCATCTCCGTTTT	CCCAACAACAACAATAACAACA	Knapp et al. (unpublished)
a10	a10_10	GM1392	199.16	(GAA)5	0.387793	TCGTGCTCGAGTACCTAAGGA	ATCATCCACCGCTTAATCTCC	Knapp et al. (unpublished)
b10	b10_01	Ah3TC22G05	0	(TC)14 (CT)7	0.57	TATACTCTGATTTTCCCGCCAT	GAGCCATTCGATTAAGCTGTG	Macedo et al. 2012
b10	b10_01	Ah3TC38F01	0	(GA)27	0.71441	TTTATGCATCACTTCAAGCAGG	AGCTGTTGAGCTTGCATCCTAT	Macedo et al. 2012
b10	b10_01	seq7H6	16.7	(CTT)12	0.641399	CATCCTCACGGGAGTCAGAT	ATACCTACGCGTTGTGGAGC	Ferguson et al. 2004
b10	b10_02	IPAHM176	22.45	(G)5(GA)18	0.375	TTCAGCAAAAACATGCAAGG	TGCAATGAGTTATATTCACCTCTCC	Cuc et al. 2008
b10	b10_02	seq3E10	30.35	(TAA)14	0.369846	TCCCAAAAATAACAAACATGGA	ACGCTTTGAGACTCGTCGTT	Ferguson et al. 2004
b10	b10_03	TC11A02	42.55	(AG)19		AATCGGAATGGCAAGAGACA	AGAGCAAAGGGCGAATCTATG	Moretzsohn et al. 2005
b10	b10_03	AC2B03	44.4	(CT)9(CA)21		CTCGCTATACTAGGTTTTGGGTGT	TGGTTTGCCTTTCTAGCCATTA	Moretzsohn et al. 2005
b10	b10_03	GA156	44.4	(CT)26		CTACTCCCTCTGCTGCTTCCT	TAGGGTTTCGTTGAGGAGGTT	Ma et al. 2006
b10	b10_03	Ah3TC31C09	46.2	(AG)21	0.57986	TCAAACAGTTCATGAGCAATAACA	AGGAAGAATCAGTGAGCTACGC	Macedo et al. 2012
b10	b10_03	Ah3TC23F04	47.4	(GA)20	0.23819	CACGTGTAATAGTTGCTCAAAAT	TATATGCATCAGACTCTCCAGC	Macedo et al. 2012
b10	b10_03	IPAHM689	47.4	(GA)20	0.703125	GATGACAATAGCGACGAGCA	GTAAGCCTGCAGCAACAACA	Cuc et al. 2008
b10	b10_03	TC3E05	47.4	(GA)25	0.5632	CACCACTTGAGTTGGTGAGG	CTTCTTCTTCTCCCGCAATG	Moretzsohn et al. 2005
b10	b10_03	TC4A02	49.06	(GA)26	0.4992	ATTCAAATCGGAATGGCAAG	GAGCAAAGGGCGAATCTATG	Moretzsohn et al. 2005
b10	b10_03	AC3F07	53.14	(TG)46		TATCCTGCTTCAGCTCCCATT	CGGCCCAGCATTCTAAAGTA	Moretzsohn et al. 2005
b10	b10_03	IPAHM531	53.48	(TAC)7	0.2688	TGCCAGGTTGCTGTAACAAA	CATACACGCTTTTCCCCTGT	Cuc et al. 2008
b10	b10_03	TC7H11	54.88	(AG)18	0.641399	AGGTTGGAACTATGGCTGATTG	CCAGTTTAGCATGTGTGGTTCA	Moretzsohn et al. 2005
b10	b10_03	Ah3TC23H10	56.59	(GA)19	0.86364	TCCCTTTGAGTCATTCATTGTG	CATCAGAGCTCCTTTTCCCTAA	Macedo et al. 2012
b10	b10_04	GM2531	61.38	(AAC)5	0.513185	CAAGGATGTCCCAGATGATGT	GGACTCAATTTGTCGACCCTA	Knapp et al. (unpublished)
b10	b10_04	GA131	62.13	(GT)7(GA)10(GT)7		ATGTCCTTGCCTTGTTTCGTT	TAGTTGGCGGTATGGCTTAGA	Ma et al. 2006
b10	b10_04	EE_16	65.43	(TGC)5		ATGGGACCACGAACATTTGA	GAGCACGTTCAAGCACTCATT	Liang etal, 2009
b10	b10_04	RN3E10	69.05	(GAC)6		TAGAAGAAGGAGAGGGTGAGAA	CTAAGATGGTGGTGGGAATTA	Moretzsohn et al. 2005
b10	b10_04	PM675	70.35	(CAT)24	0.345679	AATACCCTTCCCCAATCACC	TGCTTCTGCTCGATGTTCTG	He et al. 2003
b10	b10_04	IPAHM23	75.45	(CA)17(TA)3	0.2688	GTGTCTTTTCGTTCGCGATT	CGACTCTTAGGGTGGATTATAGTAAGA	Cuc et al. 2008
b10	b10_04	seq3E10-2	75.68	(TAA)14	0.369846	TCCCAAAAATAACAAACATGGA	ACGCTTTGAGACTCGTCGTT	Ferguson et al. 2004
b10	b10_05	ARS771	82.47			TCCAGGGTCACTGTTCTTCC	CGTTGGTTTCATCAAAGGCT	He et al. unpublished
b10	b10_05	GM690	88.07	(CT)26		CTACTCCCTCTGCTGCTTCCT	TAGGGTTTCGTTGAGGAGGTT	Budiman etal.2006
b10	b10_06	GM678	110.39	(GT)7(GA)10(GT)7		ATGTCCTTGCCTTGTTTCGTT	TAGTTGGCGGTATGGCTTAGA	Budiman etal.2006
b10	b10_06	GM1742	118.73	AAC		GCCTTGTTGCAATCATCACA	CAACCAGCTCCTTCTCTACCC	Knapp et al. (unpublished)
b10	b10_06	GM2165	119.93	TC		CTACGCGCATCGCATAATATC	CAACCAGCTCCTTCTCTACCC	Knapp et al. (unpublished)
b10	b10_07	IPAHM475	121.43	(GT)7(GA)12	0.375	GTGATTTCCTGGTTGGTGCT	AGCCTCAGCTGGTTTTGCT	Cuc et al. 2008
b10	b10_07	GM1573	130.53	(TC)24	0.141107	GAGACCGGAGACGGAGAGTAT	ACGCCCATAGATTAACCCAGT	Knapp et al. (unpublished)
b10	b10_08	GM2032	142.53	(CATA)6	0.423515	GCCGATGATGTACGTTTCTTC	GAGACGGCATGTCAAAAGAAT	Knapp et al. (unpublished)
b10	b10_08	GM1009	151.99	(CTC)5	0.343405	TTTCCTTCTTTCCCTTCTTCTTC	CGTTGTTGCCGTTAAACTGA	Knapp et al. (unpublished)
b10	b10_08	GM1483	155.89	(TCA)13	0.600494	GCTGTTACATGGGCATCATTT	TCATCAGAGACCCAAGATCCA	Knapp et al. (unpublished)
b10	b10_09	seq8D9	166.99	(CTT)13	0.592593	TGAGTTTCCCCAAAAGGAGA	CAACAACAATACGGCCAACA	Ferguson et al. 2004
